# Supplementary material for: Synthesis of new class of indole acetic acid sulfonate derivatives as ectonucleotidases inhibitors
Source: Royal Society of Chemistry journal article supplement (doi:10.1039/d3ra04266a), 2023-01-01

**Supporting data file:**

**Synthesis of New Class of Indole Acetic Acid Sulfonate Derivatives as Ectonucleotidases Inhibitors**

**Muhammad Siraj Khan Jadoon<sup>a, b</sup>, Julie Pelletier<sup>c</sup>, Jean Sévigny<sup>c, d</sup>, Jamshed Iqbal<sup>a, b, e \*</sup>**

- a- Department of Pharmacy, COMSATS University Islamabad, Abbottabad Campus, Abbottabad, 22060, Pakistan
- b- Centre for Advanced Drug Research, COMSATS University Islamabad, Abbottabad Campus, Abbottabad, 22060, Pakistan
- c- Centre de Recherche du CHU de Québec-Université Laval, Québec G1V 4G2, Canada
- d- Département de microbiologie-infectiologie et d'immunologie, Faculté de Médecine, Université Laval, Québec G1V 0A6, Canada
- e- Department of Chemistry, COMSATS University Islamabad, Abbottabad Campus, Abbottabad, 22060, Pakistan

**Table of Contents:**

| <b>S.No</b> | <b>Description</b>                                                                                                                                                                                         | <b>Page. No</b> |
|-------------|------------------------------------------------------------------------------------------------------------------------------------------------------------------------------------------------------------|-----------------|
| <b>1-</b>   | <b>Table S1:</b> Indole acetic acid sulfonate derivatives (5a-5o) description                                                                                                                              | <b>2</b>        |
| <b>2-</b>   | <b>Table S2:</b> Biological activities results for Indole acetic acid sulfonate derivatives (5a-5o),<br>a) <i>h</i> -e5'NT and <i>r</i> -e5'NT<br>b) Human ENPP1 and ENPP3<br>c) <i>h</i> -TNAP            | <b>4</b>        |
| <b>3-</b>   | <b>Figure FS1:</b> Illustration of 2D ligand-Protein interactions conformations of <b>5j</b> and <b>5e</b> against <b>a)</b> <i>h</i> -ENPP1, <b>b)</b> <i>h</i> -ENPP3                                    | <b>16</b>       |
| <b>4-</b>   | <b>Figure FS2.</b> Presentation of 2D binding modes of inhibitor <b>5c</b> and <b>5j</b> against <b>a)</b> <i>h</i> -e5'NT residues and <b>5e</b> and <b>5l</b> against <b>b)</b> <i>r</i> -e5'NT residues | <b>17</b>       |
| <b>5-</b>   | <b>Figure FS3.</b> 2D ligand-Protein Interactions docked conformations presentation for compound <b>5e</b> and <b>5g</b> against <i>h</i> -TNAP                                                            | <b>17</b>       |
| <b>6-</b>   | <b>Figure FS5:</b> NMR spectra's (presenting <sup>1</sup> H NMR and <sup>13</sup> C NMR) of Indole Acetic Acid Sulfonate Derivatives (5a-5o)                                                               | <b>18</b>       |

**1-Table S1: Indole acetic acid sulfonate derivatives (5a-5o) description**

| Comp # | IUPAC Name                                                                      | Mol.wt. | Mol. Formula                                                      | Solubility          | Product structure                                                                    | Appearance                   | Melting point |
|--------|---------------------------------------------------------------------------------|---------|-------------------------------------------------------------------|---------------------|--------------------------------------------------------------------------------------|------------------------------|---------------|
| 5a     | 2-(2-(1 <i>H</i> -indol-3-yl)acetamido)phenyl 2-chlorobenzenesulfonate          | 440.90  | C <sub>22</sub> H <sub>17</sub> ClN <sub>2</sub> O <sub>4</sub> S | DMS<br>O<br>Acetone | 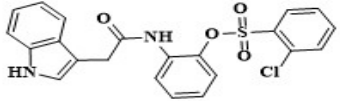   | Off white crystalline powder | 181-183°C     |
| 5b     | 2-(2-(1 <i>H</i> -indol-3-yl)acetamido)phenyl phenylmethane sulfonate           | 420.48  | C <sub>23</sub> H <sub>20</sub> N <sub>2</sub> O <sub>4</sub> S   | DMS<br>O<br>Acetone |     | Off white crystalline powder | 134-137°C     |
| 5c     | 2-(2-(1 <i>H</i> -indol-3-yl)acetamido)phenyl 4-fluorobenzenesulfonate          | 424.45  | C <sub>22</sub> H <sub>17</sub> FN <sub>2</sub> O <sub>4</sub> S  | DMS<br>O<br>Acetone |    | white crystalline powder     | 161-163°C     |
| 5d     | 2-(2-(1 <i>H</i> -indol-3-yl)acetamido)phenyl 4-Methoxybenzenesulfonate         | 436.48  | C <sub>23</sub> H <sub>20</sub> N <sub>2</sub> O <sub>5</sub> S   | DMS<br>O<br>Acetone |    | Off white crystalline powder | 200-203°C     |
| 5e     | 2-(2-(1 <i>H</i> -indol-3-yl)acetamido)phenyl [1,1'-biphenyl]-4-sulfonate       | 482.55  | C <sub>28</sub> H <sub>22</sub> N <sub>2</sub> O <sub>4</sub> S   | DMS<br>O<br>Acetone |   | Off white crystalline powder | 193-195°C     |
| 5f     | 2-(2-(1 <i>H</i> -indol-3-yl)acetamido)phenyl 4-bromobenzenesulfonate           | 485.35  | C <sub>22</sub> H <sub>17</sub> BrN <sub>2</sub> O <sub>4</sub> S | DMS<br>O<br>Acetone |  | Off white crystalline powder | 183-186°C     |
| 5g     | 2-(2-(1 <i>H</i> -indol-3-yl)acetamido)phenyl 3-chloro-4-methylbenzenesulfonate | 454.93  | C <sub>22</sub> H <sub>17</sub> ClN <sub>2</sub> O <sub>4</sub> S | DMS<br>O<br>Acetone |  | Off white crystalline powder | 115-117°C     |
| 5h     | 2-(2-(1 <i>H</i> -indol-3-yl)acetamido)phenyl 1-aminonaphthalene-2-sulfonate    | 471.53  | C <sub>22</sub> H <sub>17</sub> ClN <sub>2</sub> O <sub>4</sub> S | DMS<br>O<br>Acetone |  | Off white crystalline powder | 116-118°C     |
| 5i     | 2-(2-(1 <i>H</i> -indol-3-yl)acetamido)phenyl 4-iodobenzenesulfonate            | 532.35  | C <sub>22</sub> H <sub>17</sub> IN <sub>2</sub> O <sub>4</sub> S  | DMS<br>O<br>Acetone |  | Off white crystalline powder | 169-172°C     |

|    |                                                                        |        |                                                                                   |                     |                                                                                    |                              |           |
|----|------------------------------------------------------------------------|--------|-----------------------------------------------------------------------------------|---------------------|------------------------------------------------------------------------------------|------------------------------|-----------|
| 5j | 2-(2-(1 <i>H</i> -indol-3-yl)acetamido)phenyltrifluoromethanesulfonate | 398.36 | C <sub>17</sub> H <sub>13</sub><br>F <sub>3</sub> N <sub>2</sub> O <sub>4</sub> S | DMS<br>O<br>Acetone | 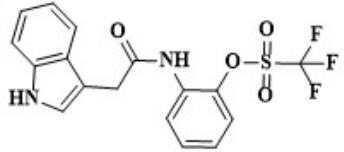 | Off white crystalline powder | 114-116°C |
| 5k | 2-(2-(1 <i>H</i> -indol-3-yl)acetamido)phenylpropane-2-sulfonate       | 372.44 | C <sub>19</sub> H <sub>20</sub><br>N <sub>2</sub> O <sub>4</sub> S                | DMS<br>O<br>Acetone |  | Off white crystalline powder | 139-141°C |
| 5l | 2-(2-(1 <i>H</i> -indol-3-yl)acetamido)phenyl 4-chlorobenzenesulfonate | 440.90 | C <sub>22</sub> H <sub>17</sub><br>ClN <sub>2</sub> O <sub>4</sub> S              | DMS<br>O<br>Acetone |  | Off white crystalline powder | 186-188°C |
| 5m | 2-(2-(1 <i>H</i> -indol-3-yl)acetamido)phenylquinoline-8-sulfonate     | 457.50 | C <sub>25</sub> H <sub>19</sub><br>N <sub>3</sub> O <sub>4</sub> S                | DMS<br>O<br>Acetone |  | Off white crystalline powder | 178-180°C |

|    |                                                                        |        |                                                                                 |                     |                                                                                      |                              |           |
|----|------------------------------------------------------------------------|--------|---------------------------------------------------------------------------------|---------------------|--------------------------------------------------------------------------------------|------------------------------|-----------|
| 5n | 2-(2-(1 <i>H</i> -indol-3-yl)acetamido)phenylthiophene-2-sulfonate     | 412.48 | C <sub>20</sub> H <sub>16</sub><br>N <sub>2</sub> O <sub>4</sub> S <sub>2</sub> | DMS<br>O<br>Acetone | 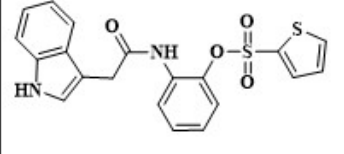  | Off white crystalline powder | 180-183°C |
| 5o | 2-(2-(1 <i>H</i> -indol-3-yl)acetamido)phenyl 4-methylbenzenesulfonate | 420.48 | C <sub>23</sub> H <sub>20</sub><br>N <sub>2</sub> O <sub>4</sub> S              | DMS<br>O<br>Acetone |  | Off white crystalline powder | 160-162°C |

2-Table S2: Biological activities results for Indole acetic acid sulfonate derivatives (5a-5o),  
a) *h*-e5'NT and *r*-e5'NT, b) Human NPP1 and NPP3, c) *h*-TNAP

a) *h*-e5'NT and *r*-e5'NT

| S.No | Comp. Code | <i>h</i> -e5'NT                                                                     |                                          | <i>r</i> -e5'NT                                                                      |                                          |
|------|------------|-------------------------------------------------------------------------------------|------------------------------------------|--------------------------------------------------------------------------------------|------------------------------------------|
|      |            | Graph                                                                               | IC <sub>50</sub> ±SEM (μM) / %Inhibition | Graph                                                                                | IC <sub>50</sub> ±SEM (μM) / %Inhibition |
| 1.   | <b>5a</b>  | 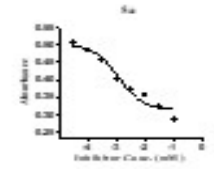   | <b>1.19±0.02</b>                         | -                                                                                    | <b>22.72%</b>                            |
| 2.   | <b>5b</b>  |    | <b>13.22±3.14</b>                        | -                                                                                    | <b>38.52%</b>                            |
| 3.   | <b>5c</b>  |  | <b>0.37±0.03</b>                         |  | <b>1.66±0.04</b>                         |
| 4.   | <b>5d</b>  |  | <b>3.46±0.12</b>                         |  | <b>1.77±0.12</b>                         |
| 5.   | <b>5e</b>  |  | <b>0.56±0.016</b>                        |  | <b>0.98±0.02</b>                         |

|     |           |                                                                                     |                   |                                                                                      |                  |
|-----|-----------|-------------------------------------------------------------------------------------|-------------------|--------------------------------------------------------------------------------------|------------------|
| 6.  | <b>5f</b> | 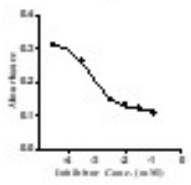   | <b>0.69±0.001</b> |    | <b>1.64±0.02</b> |
| 7.  | <b>5g</b> |    | <b>4.4±0.19</b>   |    | <b>1.85±0.11</b> |
| 8.  | <b>5h</b> |    | <b>1.17±0.13</b>  |    | <b>0.91±0.04</b> |
| 9.  | <b>5i</b> |  | <b>4.85±0.55</b>  |  | <b>0.81±0.05</b> |
| 10. | <b>5j</b> |  | <b>0.89±0.04</b>  |  | <b>5.12±0.61</b> |
| 11. | <b>5k</b> | -                                                                                   | <b>37.52%</b>     | -                                                                                    | <b>28.65%</b>    |
| 12. | <b>5l</b> |  | <b>0.43±0.03</b>  |  | <b>5.67±0.11</b> |

|     |                      |   |                     |   |                    |
|-----|----------------------|---|---------------------|---|--------------------|
| 13. | <b>5m</b>            |   | <b>6.53±0.67</b>    | - | <b>30.03%</b>      |
| 14. | <b>5n</b>            | - | <b>44.68%</b>       | - | <b>46.64%</b>      |
| 15. | <b>5o</b>            |   | <b>3.21±0.83</b>    |   | <b>4.86±0.04</b>   |
| 16. | <b>Sulfamic acid</b> |   | <b>42.1 ± 7.80a</b> |   | <b>77.3 ± 7.0a</b> |

**b)Human ENPP1 and ENPP3**

| S.No | Comp Code | NPP1  |                                          | NPP3  |                                          |
|------|-----------|-------|------------------------------------------|-------|------------------------------------------|
|      |           | Graph | IC <sub>50</sub> ±SEM (μM) / %Inhibition | Graph | IC <sub>50</sub> ±SEM (μM) / %Inhibition |
| 1.   | <b>5a</b> |       | <b>2.07±0.22</b>                         |       | <b>1.66±0.007</b>                        |
| 2.   | <b>5b</b> |       | <b>1.35±0.02</b>                         |       | <b>1.71±0.11</b>                         |
| 3.   | <b>5c</b> |       | <b>1.12±0.12</b>                         |       | <b>1.37±0.05</b>                         |
| 4.   | <b>5d</b> |       | <b>1.09±0.01</b>                         |       | <b>2.05±0.25</b>                         |

|    |           |  |                   |  |                   |
|----|-----------|--|-------------------|--|-------------------|
| 5. | <b>5e</b> |  | <b>0.32±0.01</b>  |  | <b>4.51±0.38</b>  |
| 6. | <b>5f</b> |  | <b>1.14±0.002</b> |  | <b>1.23±0.01</b>  |
| 7. | <b>5g</b> |  | <b>1.69±0.05</b>  |  | <b>1.31±0.11</b>  |
| 8. | <b>5h</b> |  | <b>0.91±0.02</b>  |  | <b>1.02±0.004</b> |



|     |           |  |                   |  |                   |
|-----|-----------|--|-------------------|--|-------------------|
| 9.  | <b>5i</b> |  | <b>1.07±0.06</b>  |  | <b>3.26±0.15</b>  |
| 10. | <b>5j</b> |  | <b>0.59±0.003</b> |  | <b>0.62±0.003</b> |
| 11. | <b>5k</b> |  | <b>1.74±0.05</b>  |  | <b>0.89±0.04</b>  |
| 12. | <b>5l</b> |  | <b>0.85±0.03</b>  |  | <b>0.77±0.03</b>  |

|    |                                       |   |                   |  |                   |
|----|---------------------------------------|---|-------------------|--|-------------------|
| 13 | <b>5m</b>                             |   | <b>1.36±0.09</b>  |  | <b>1.22±0.01</b>  |
| 14 | <b>5n</b>                             | - | <b>38.03%</b>     |  | <b>2.55±0.07</b>  |
| 15 | <b>5o</b>                             | - | <b>28.32%</b>     |  | <b>2.67±0.46</b>  |
| 16 | <b>Suramin<br/>(as standard drug)</b> |   | <b>18.54±1.14</b> |  | <b>12.83±0.23</b> |

c)h-TNAP

| S.No | Comp. Code | h-TNAP    |                                          |
|------|------------|-----------|------------------------------------------|
|      |            | Graph     | IC <sub>50</sub> ±SEM (μM) / %Inhibition |
| 1.   | 5a         | <p>5a</p> | 1.6±0.11                                 |
| 2.   | 5b         | -         | 42.39%                                   |
| 3.   | 5c         | <p>5c</p> | 1.48±0.02                                |
| 4.   | 5d         | <p>5d</p> | 5.18±0.46                                |

|    |           |                                                                                                                                                                                                                                        |                  |
|----|-----------|----------------------------------------------------------------------------------------------------------------------------------------------------------------------------------------------------------------------------------------|------------------|
| 5. | <b>5e</b> | <p style="text-align: center;"><b>5e</b></p> 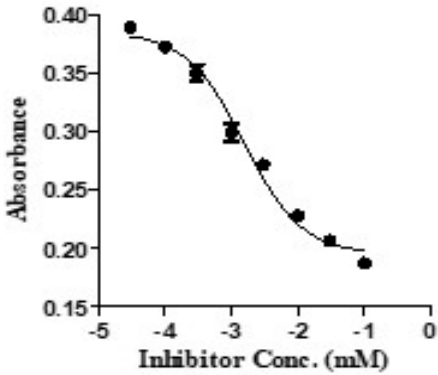 <p style="text-align: center;">Absorbance</p> <p style="text-align: center;">Inhibitor Conc. (mM)</p>   | <b>1.56±0.03</b> |
| 6. | <b>5f</b> | <p style="text-align: center;"><b>5f</b></p>  <p style="text-align: center;">Absorbance</p> <p style="text-align: center;">Inhibitor Conc. (mM)</p>  | <b>6.58±0.25</b> |
| 7. | <b>5g</b> | <p style="text-align: center;"><b>5g</b></p>  <p style="text-align: center;">Absorbance</p> <p style="text-align: center;">Inhibitor Conc. (mM)</p> | <b>0.59±0.08</b> |

|    |           |                                                                                                                                                                                                                                        |                  |
|----|-----------|----------------------------------------------------------------------------------------------------------------------------------------------------------------------------------------------------------------------------------------|------------------|
| 8. | <b>5h</b> | <p style="text-align: center;"><b>5h</b></p> 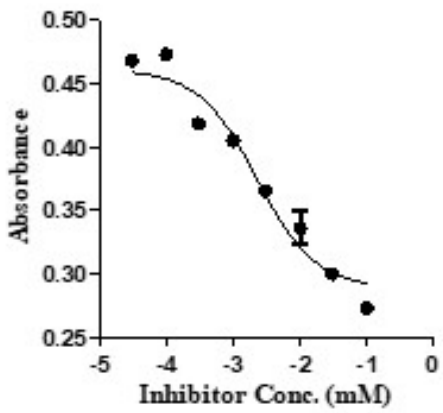 <p style="text-align: center;">Absorbance</p> <p style="text-align: center;">Inhibitor Conc. (mM)</p>   | <b>2.86±0.06</b> |
| 9. | <b>5i</b> | <p style="text-align: center;"><b>5i</b></p>  <p style="text-align: center;">Absorbance</p> <p style="text-align: center;">Inhibitor Conc. (mM)</p>  | <b>2.27±0.24</b> |
| 10 | <b>5j</b> | <p style="text-align: center;"><b>5j</b></p>  <p style="text-align: center;">Absorbance</p> <p style="text-align: center;">Inhibitor Conc. (mM)</p> | <b>1.68±0.07</b> |
| 11 | <b>5k</b> | -                                                                                                                                                                                                                                      | <b>31.75%</b>    |

|     |           |                                                                                                                                                    |                  |
|-----|-----------|----------------------------------------------------------------------------------------------------------------------------------------------------|------------------|
| 12. | <b>5l</b> | <p style="text-align: center;"><b>5l</b></p> <p style="text-align: center;">Absorbance</p> <p style="text-align: center;">Inhibitor Conc. (mM)</p> | <b>1.69±0.18</b> |
| 13. | <b>5m</b> | <p style="text-align: center;"><b>5m</b></p> <p style="text-align: center;">Absorbance</p> <p style="text-align: center;">Inhibitor Conc. (mM)</p> | <b>1.3±0.38</b>  |
| 14. | <b>5n</b> | -                                                                                                                                                  | <b>28.88%</b>    |
| 15. | <b>5o</b> | <p style="text-align: center;"><b>5o</b></p> <p style="text-align: center;">Absorbance</p> <p style="text-align: center;">Inhibitor Conc. (mM)</p> | <b>3.37±0.05</b> |

| 16.                  | <b>Levamisole</b> | <p style="text-align: center;"><b>Levamisole</b></p> 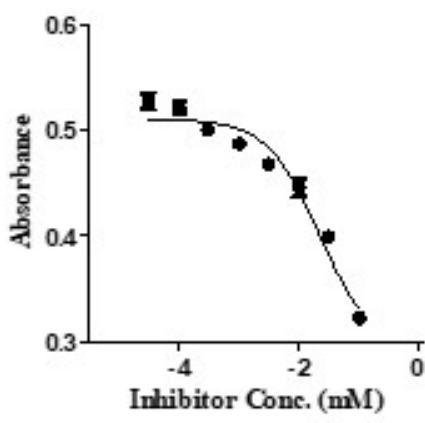 <table border="1" data-bbox="544 262 966 682"><caption>Estimated data points from the graph</caption><thead><tr><th>Inhibitor Conc. (nM)</th><th>Absorbance</th></tr></thead><tbody><tr><td>-4.5</td><td>0.53</td></tr><tr><td>-4.0</td><td>0.52</td></tr><tr><td>-3.5</td><td>0.50</td></tr><tr><td>-3.0</td><td>0.48</td></tr><tr><td>-2.5</td><td>0.46</td></tr><tr><td>-2.0</td><td>0.44</td></tr><tr><td>-1.5</td><td>0.40</td></tr><tr><td>-1.0</td><td>0.32</td></tr></tbody></table> | Inhibitor Conc. (nM) | Absorbance | -4.5 | 0.53 | -4.0 | 0.52 | -3.5 | 0.50 | -3.0 | 0.48 | -2.5 | 0.46 | -2.0 | 0.44 | -1.5 | 0.40 | -1.0 | 0.32 | <b>21.38±4.17</b> |
|----------------------|-------------------|-------------------------------------------------------------------------------------------------------------------------------------------------------------------------------------------------------------------------------------------------------------------------------------------------------------------------------------------------------------------------------------------------------------------------------------------------------------------------------------------------------------------------------------------------------------------------------------------------------------------------------------|----------------------|------------|------|------|------|------|------|------|------|------|------|------|------|------|------|------|------|------|-------------------|
| Inhibitor Conc. (nM) | Absorbance        |                                                                                                                                                                                                                                                                                                                                                                                                                                                                                                                                                                                                                                     |                      |            |      |      |      |      |      |      |      |      |      |      |      |      |      |      |      |      |                   |
| -4.5                 | 0.53              |                                                                                                                                                                                                                                                                                                                                                                                                                                                                                                                                                                                                                                     |                      |            |      |      |      |      |      |      |      |      |      |      |      |      |      |      |      |      |                   |
| -4.0                 | 0.52              |                                                                                                                                                                                                                                                                                                                                                                                                                                                                                                                                                                                                                                     |                      |            |      |      |      |      |      |      |      |      |      |      |      |      |      |      |      |      |                   |
| -3.5                 | 0.50              |                                                                                                                                                                                                                                                                                                                                                                                                                                                                                                                                                                                                                                     |                      |            |      |      |      |      |      |      |      |      |      |      |      |      |      |      |      |      |                   |
| -3.0                 | 0.48              |                                                                                                                                                                                                                                                                                                                                                                                                                                                                                                                                                                                                                                     |                      |            |      |      |      |      |      |      |      |      |      |      |      |      |      |      |      |      |                   |
| -2.5                 | 0.46              |                                                                                                                                                                                                                                                                                                                                                                                                                                                                                                                                                                                                                                     |                      |            |      |      |      |      |      |      |      |      |      |      |      |      |      |      |      |      |                   |
| -2.0                 | 0.44              |                                                                                                                                                                                                                                                                                                                                                                                                                                                                                                                                                                                                                                     |                      |            |      |      |      |      |      |      |      |      |      |      |      |      |      |      |      |      |                   |
| -1.5                 | 0.40              |                                                                                                                                                                                                                                                                                                                                                                                                                                                                                                                                                                                                                                     |                      |            |      |      |      |      |      |      |      |      |      |      |      |      |      |      |      |      |                   |
| -1.0                 | 0.32              |                                                                                                                                                                                                                                                                                                                                                                                                                                                                                                                                                                                                                                     |                      |            |      |      |      |      |      |      |      |      |      |      |      |      |      |      |      |      |                   |

Molecular docking of Indole acetic acid sulfonate derivatives (5a-5o), 2D Images of most active compounds

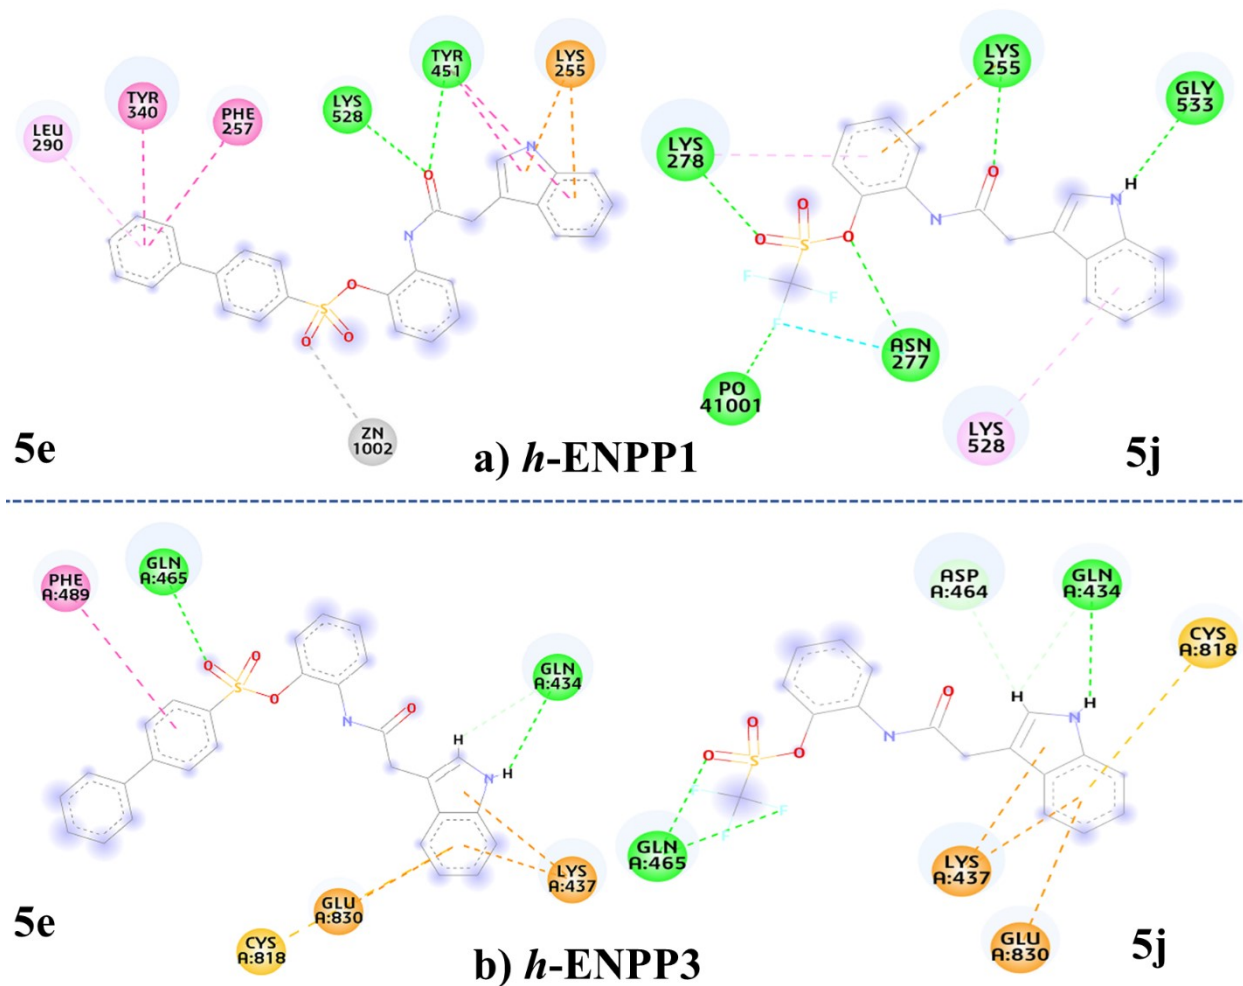

**3-Figure FS1:** Illustration of 2D ligand-Protein interactions conformations of **5j** and **5e** against **a) *h*-ENPP1**, **b) *h*-ENPP3**



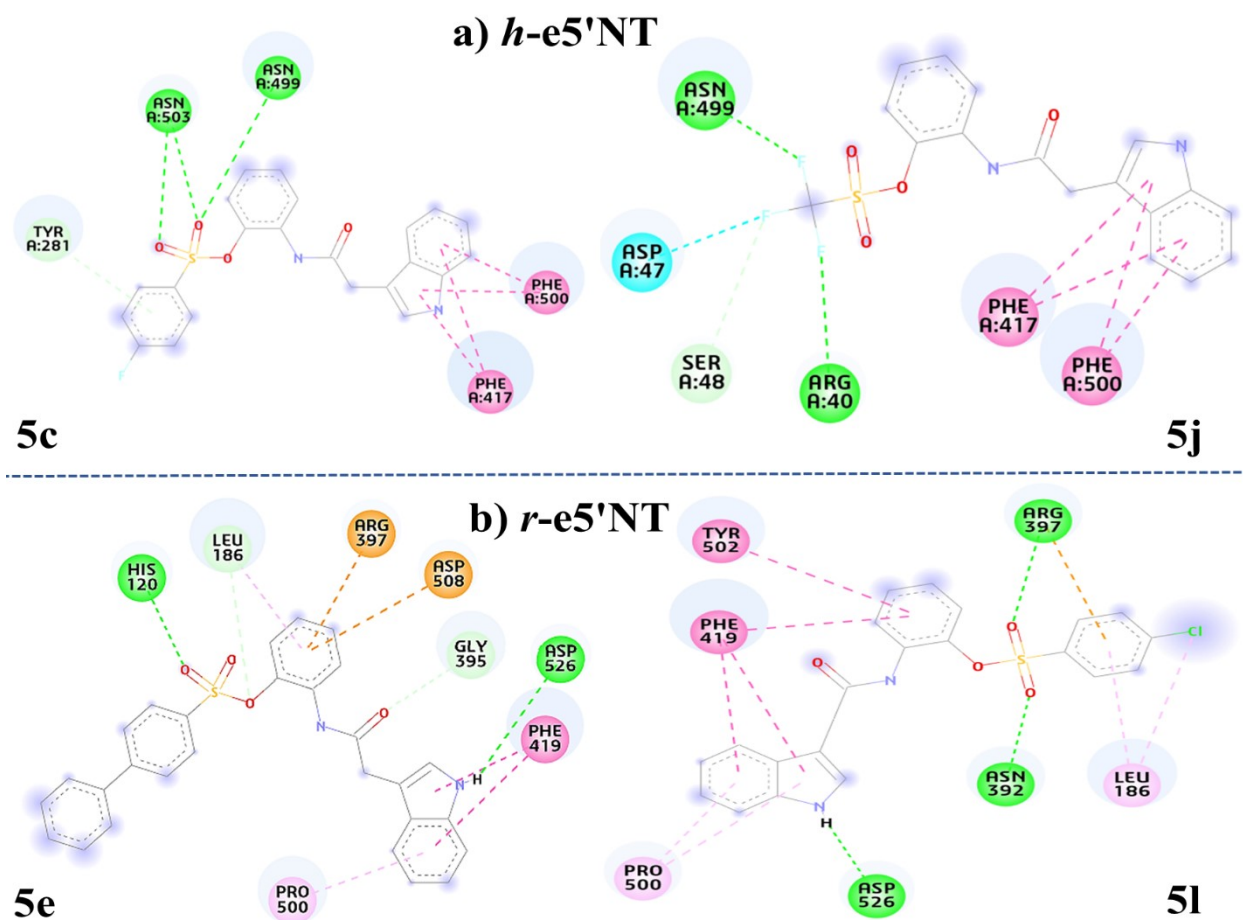

**4-Figure FS2.** Presentation of 2D binding modes of inhibitor **5c** and **5j** against **a) *h*-e5'NT** residues and **5e** and **5l** against **b) *r*-e5'NT** residues

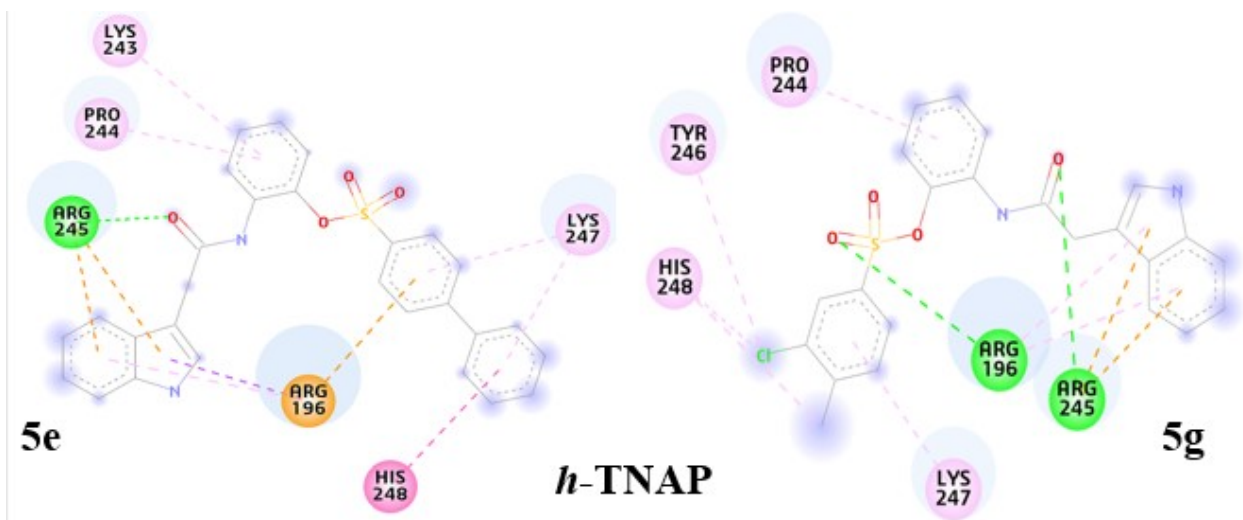

**5-Figure FS3.** 2D ligand-Protein Interactions docked conformations presentation for compound **5e** and **5g** against *h*-TNAP

**6-Figure FS5: NMR Spectra's (presenting <sup>1</sup>H NMR and <sup>13</sup>C NMR) of Indole Acetic Acid Sulfonate Derivatives (5a-5o)**

**5a. <sup>1</sup>H NMR**

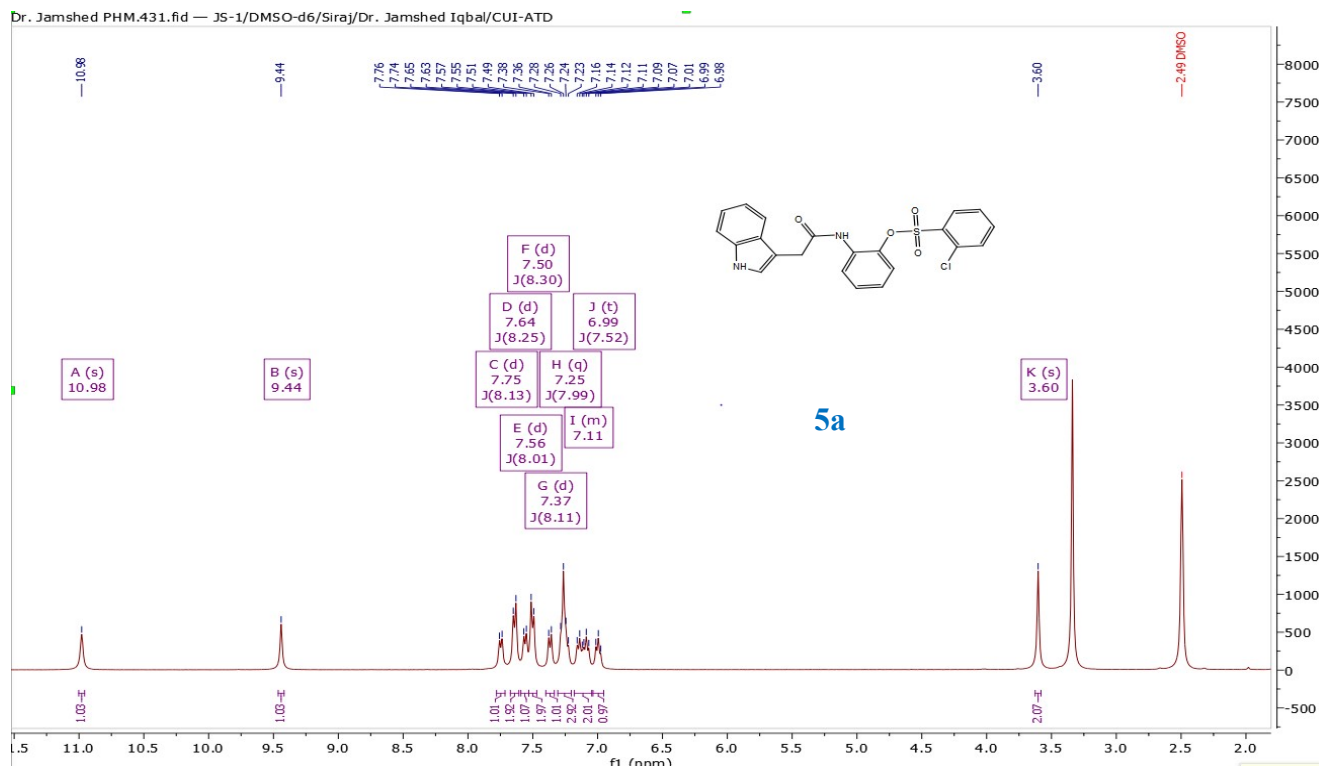

**5a. <sup>13</sup>C NMR**

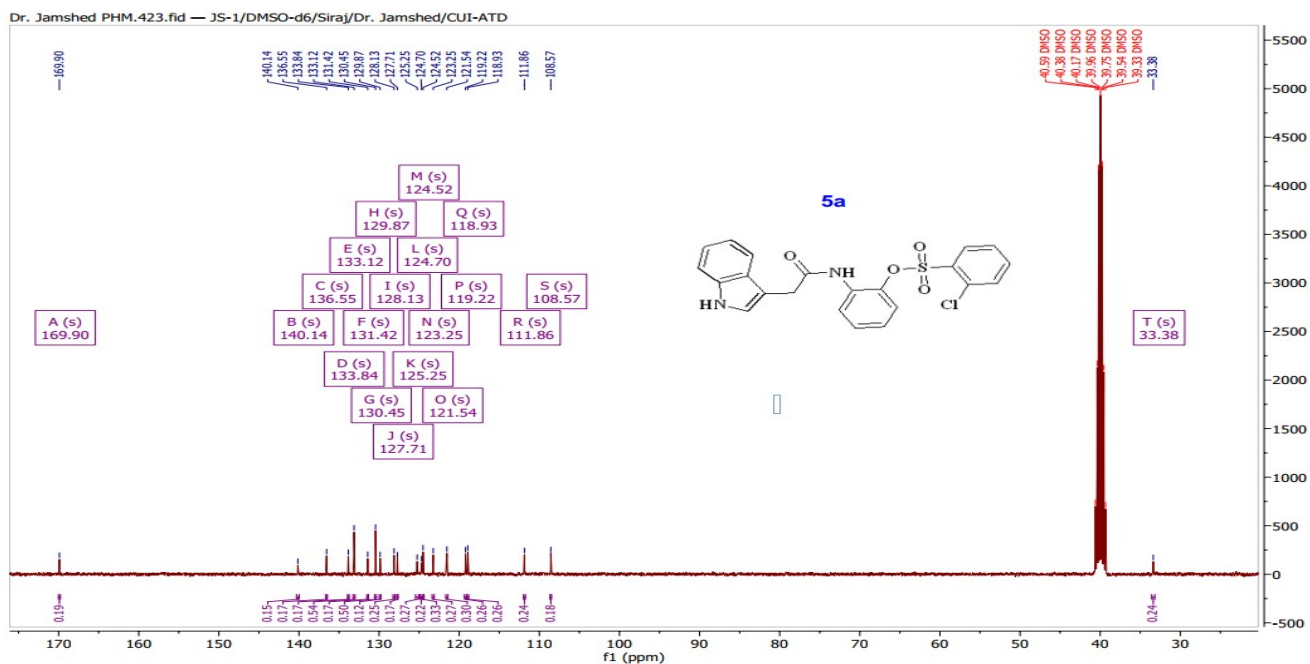

## 5b. <sup>1</sup>H NMR

Dr. Jamshed PHM.362.fid — JS-2/DMSO-d6/Sauqib/Dr. Jamshed/CUI-ATD

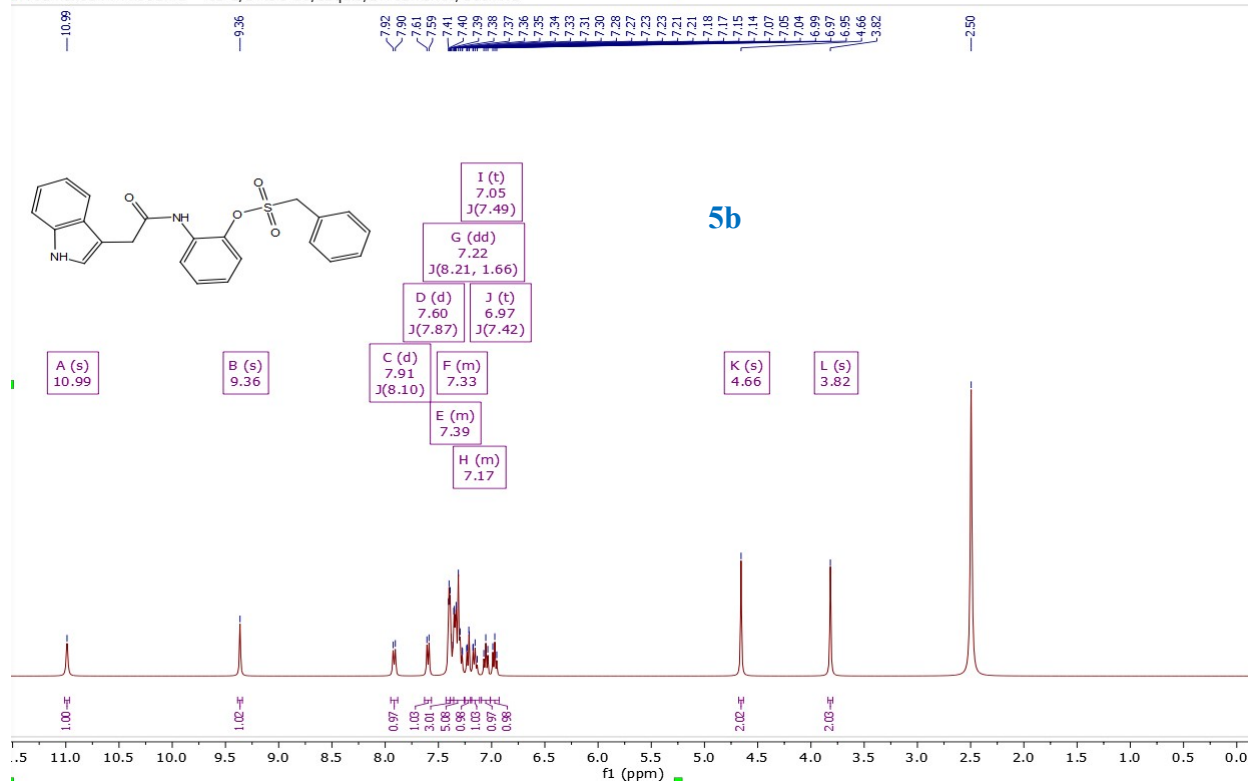

## 5b. <sup>13</sup>C NMR

Dr. Jamshed PHM.426.fid — JS-2/DMSO-d6/Sauqib/Dr. Jamshed/CUI-ATD

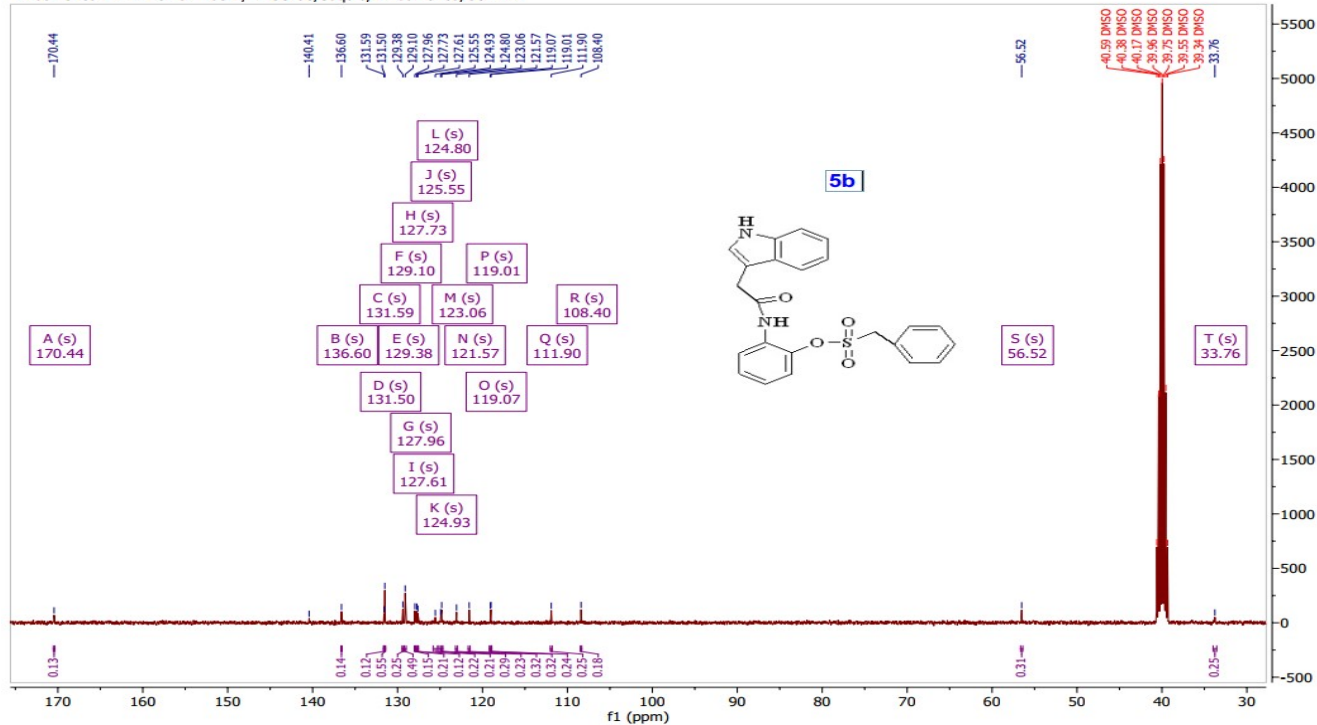

## 5c. <sup>1</sup>H NMR

Dr. Jamshed PHM.364.fid — JS-3/DMSO-d6/Siraj/Dr. Jamshed/CUI-ATD

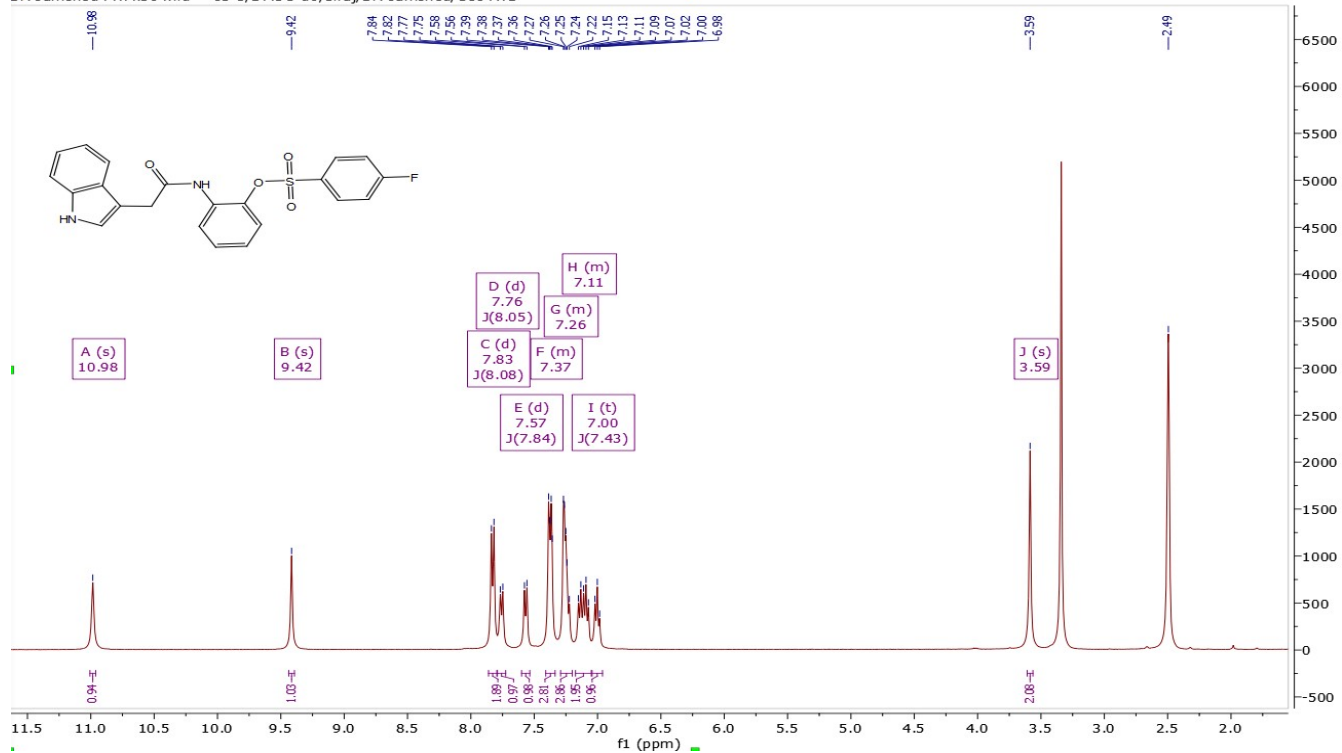

## 5c. <sup>13</sup>C NMR

Dr. Jamshed PHM.428.fid — JS-3/DMSO-d6/Siraj/Dr. Jamshed/CUI-ATD

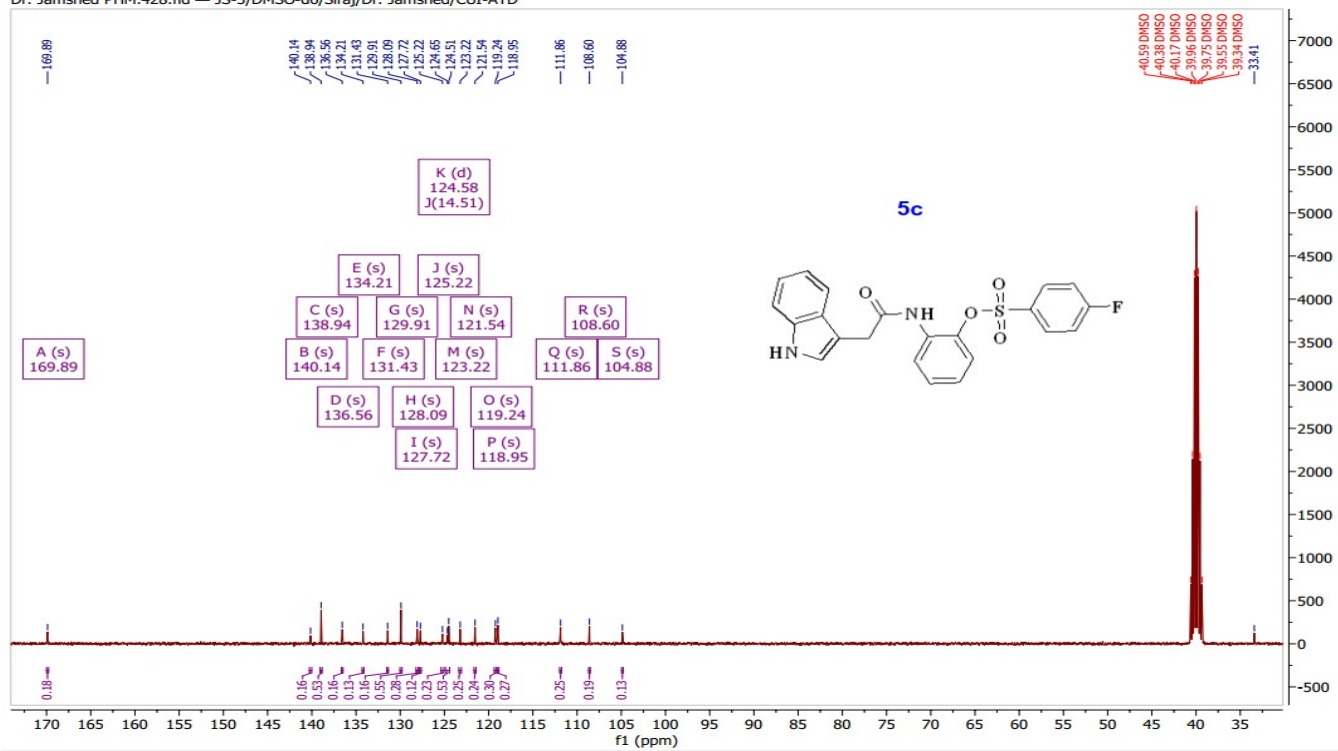

## 5d. <sup>1</sup>H NMR

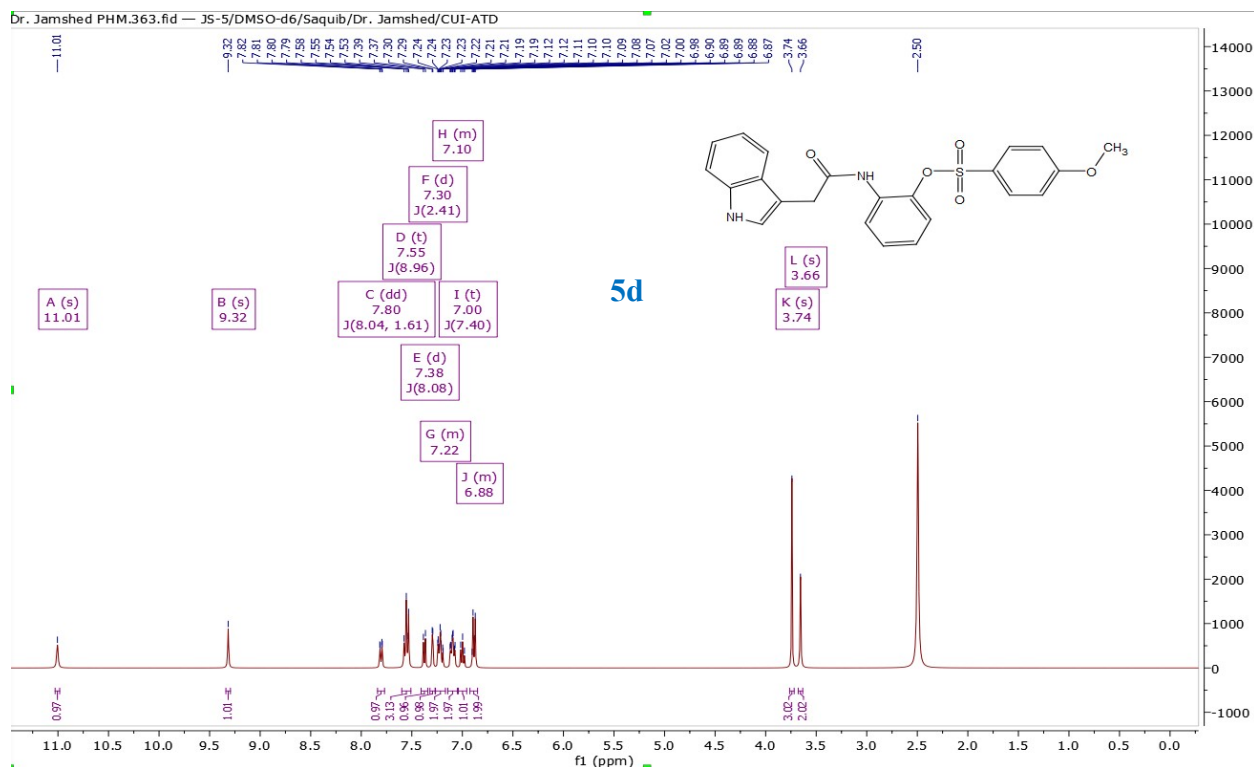

## 5d. <sup>13</sup>C NMR

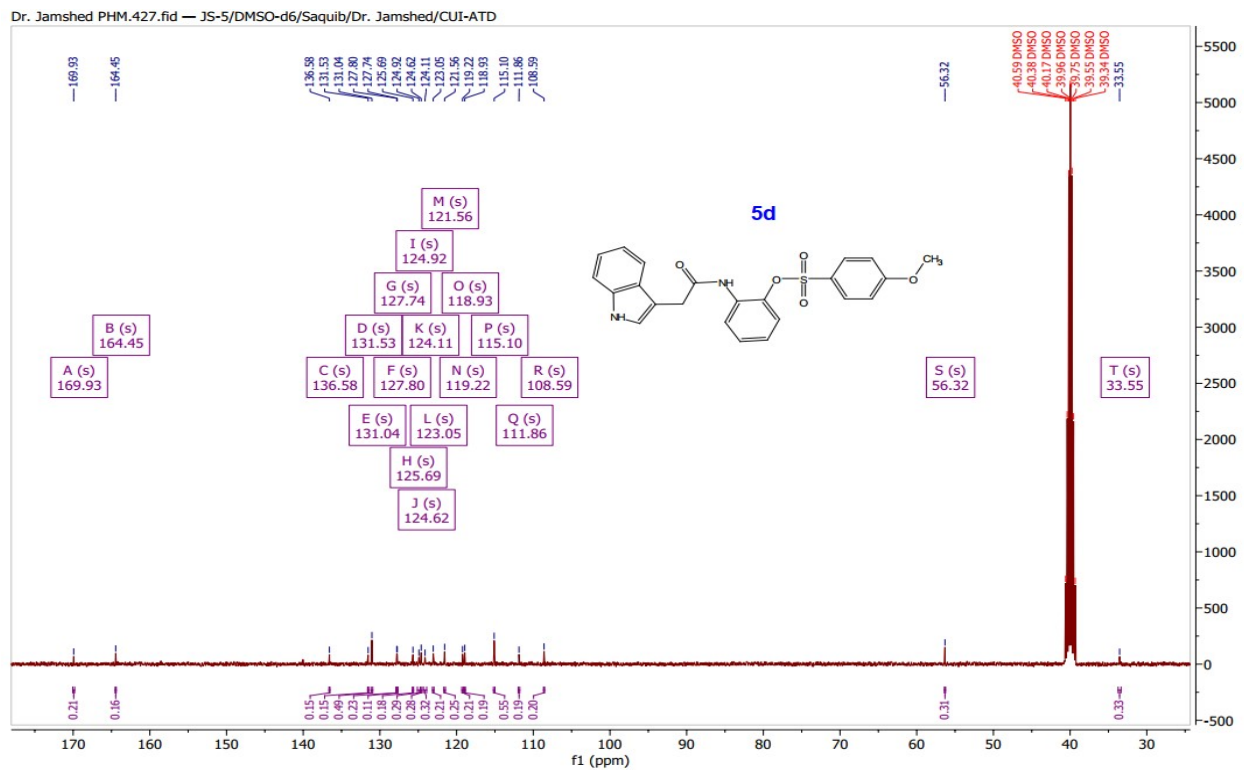

## 5e. <sup>1</sup>H NMR

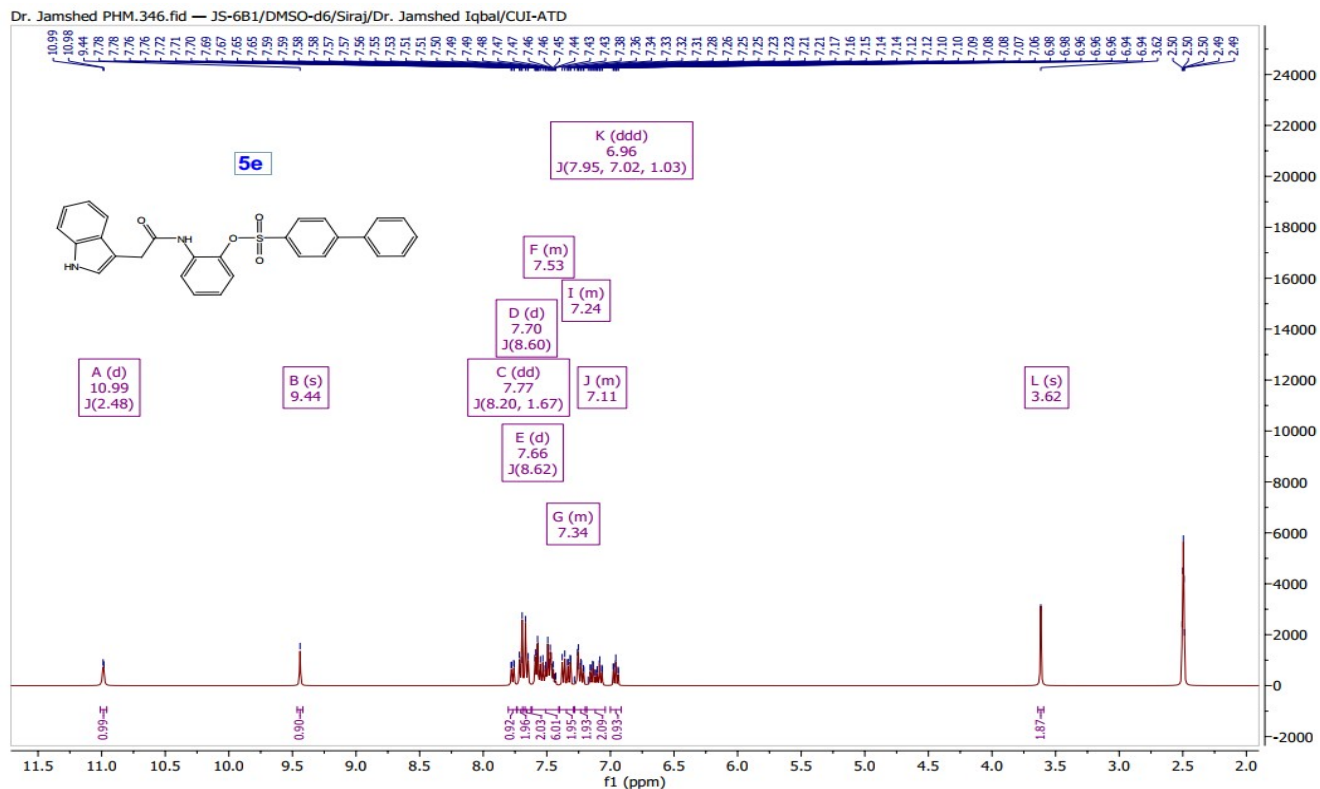

## 5e. <sup>13</sup>C NMR

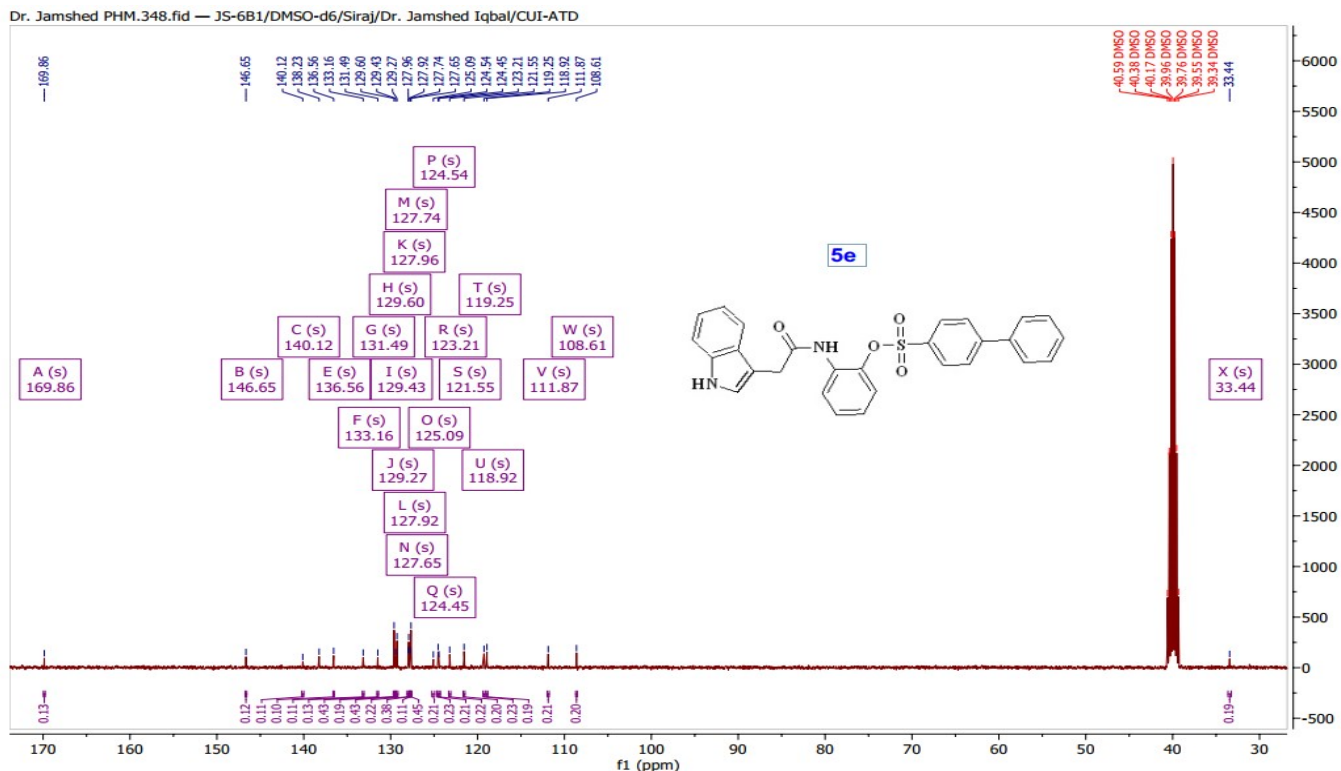

## 5f. <sup>1</sup>H NMR

Dr. Jamshed PHM.359.fid — JS-7/DMSO-d6/Saqib/Dr. Jamshed/CUI-ATD

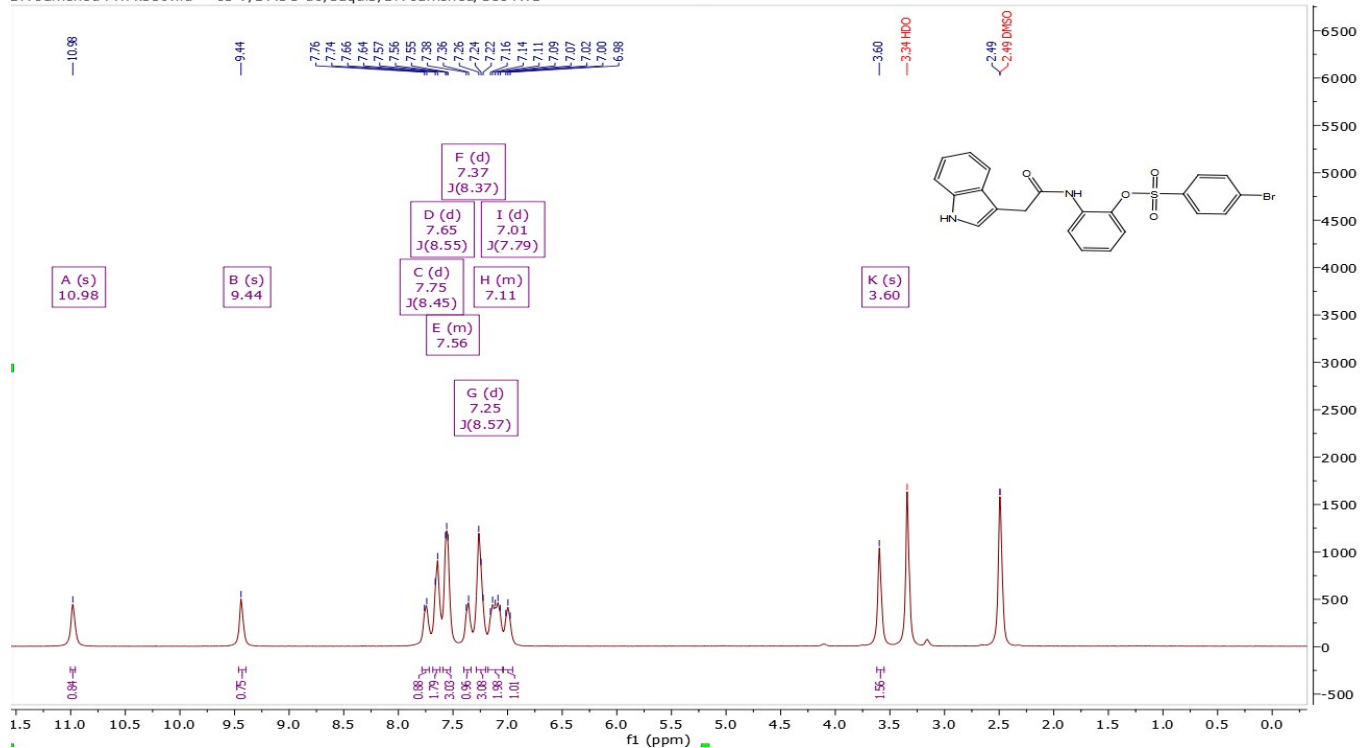

## 5f. <sup>13</sup>C NMR

Dr. Jamshed PHM.423.fid — JS-7/DMSO-d6/Saqib/Dr. Jamshed/CUI-ATD

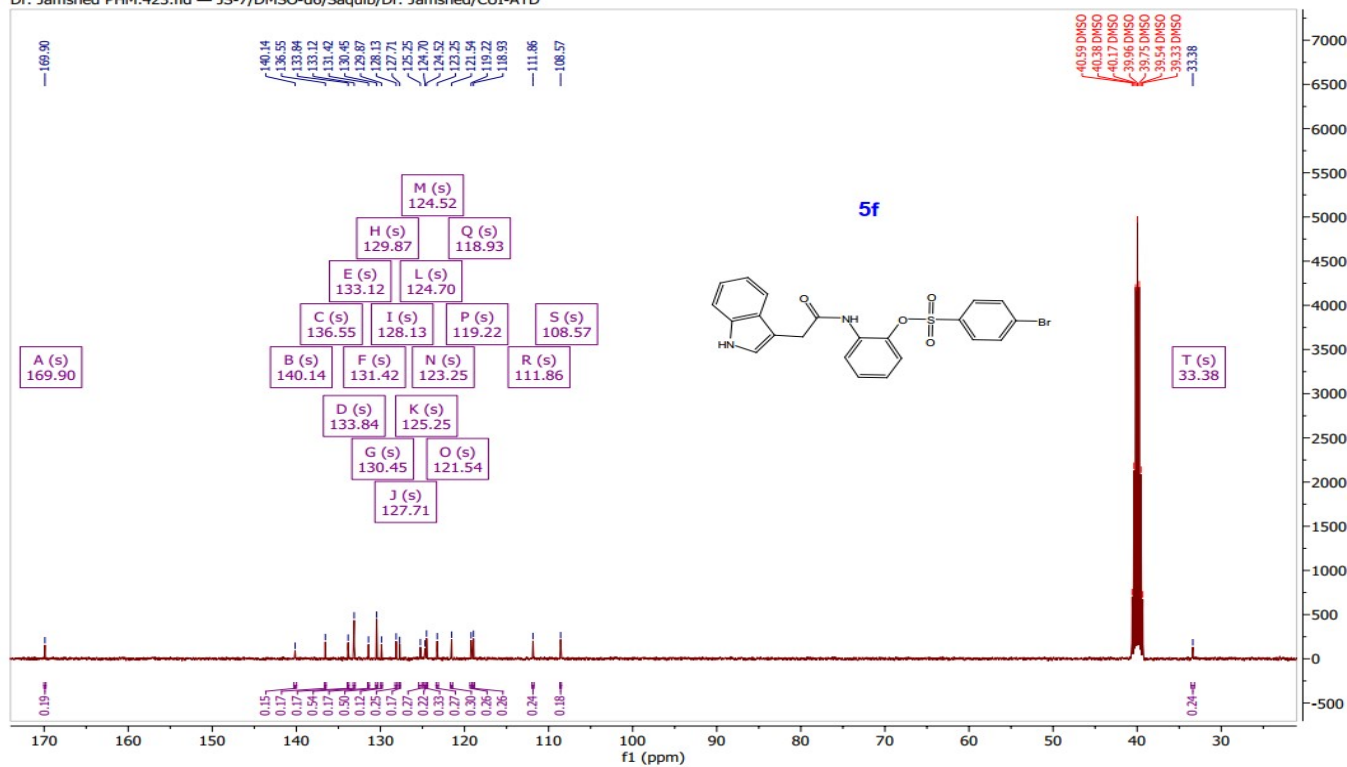

## 5g. <sup>1</sup>H NMR

Dr. Jamshed PHM.360.fid — JS-9/DMSO-d6/Saqib/Dr. Jamshed/CUI-ATD

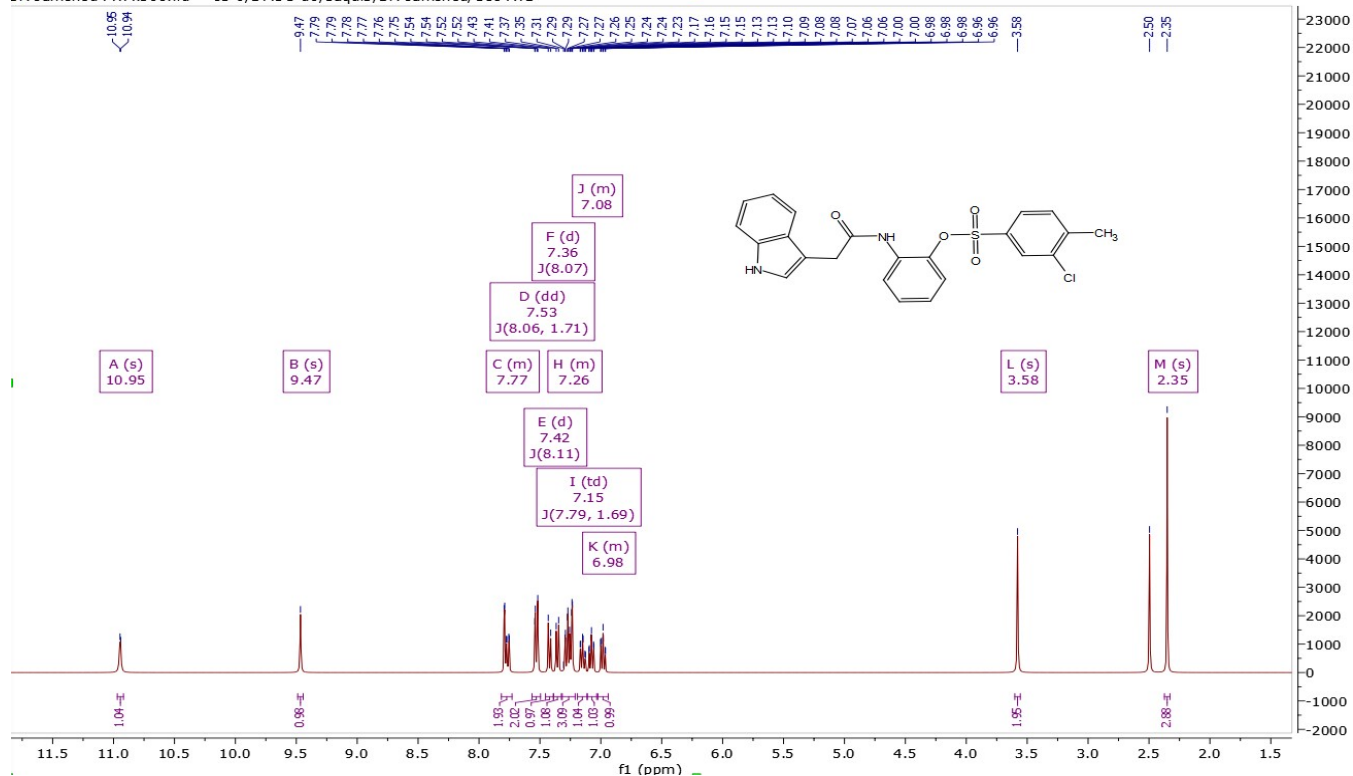

## 5g. <sup>13</sup>C NMR

Dr. Jamshed PHM.424.fid — JS-9/DMSO-d6/Saqib/Dr. Jamshed/CUI-ATD

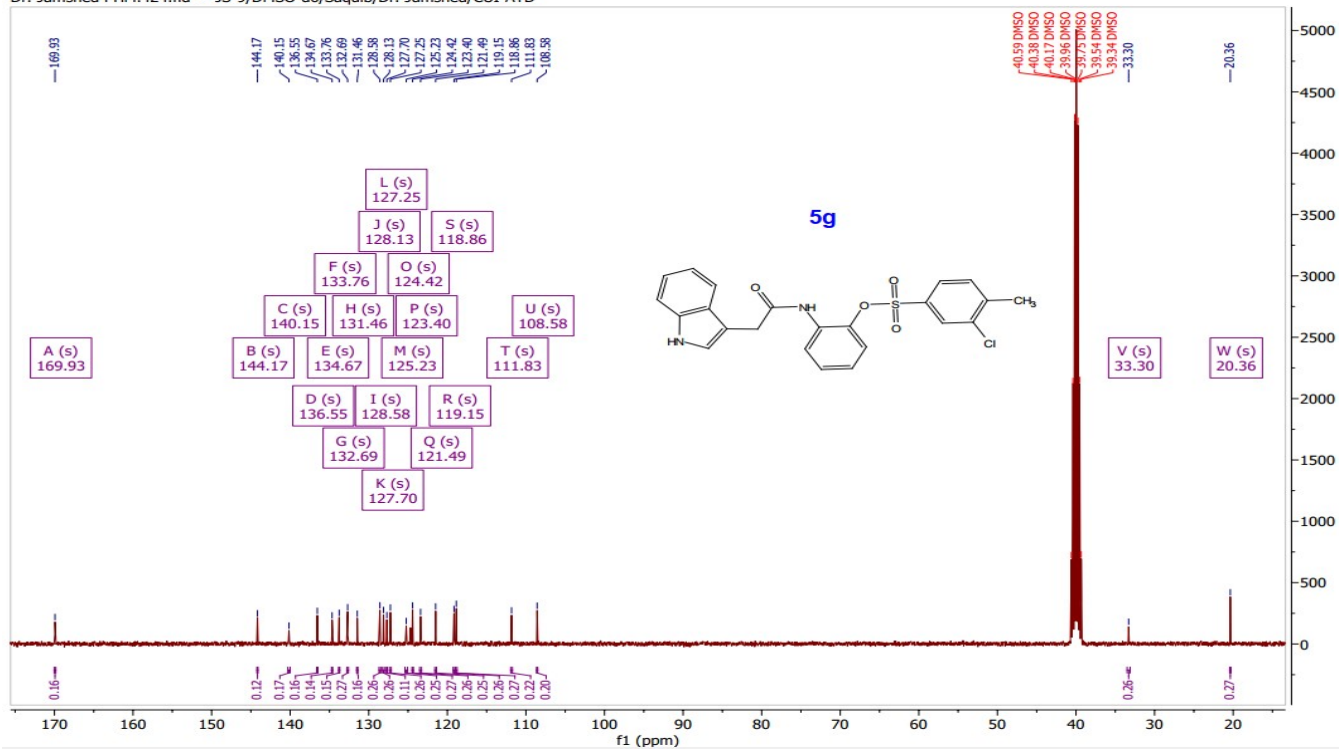



## 5h. <sup>1</sup>H NMR

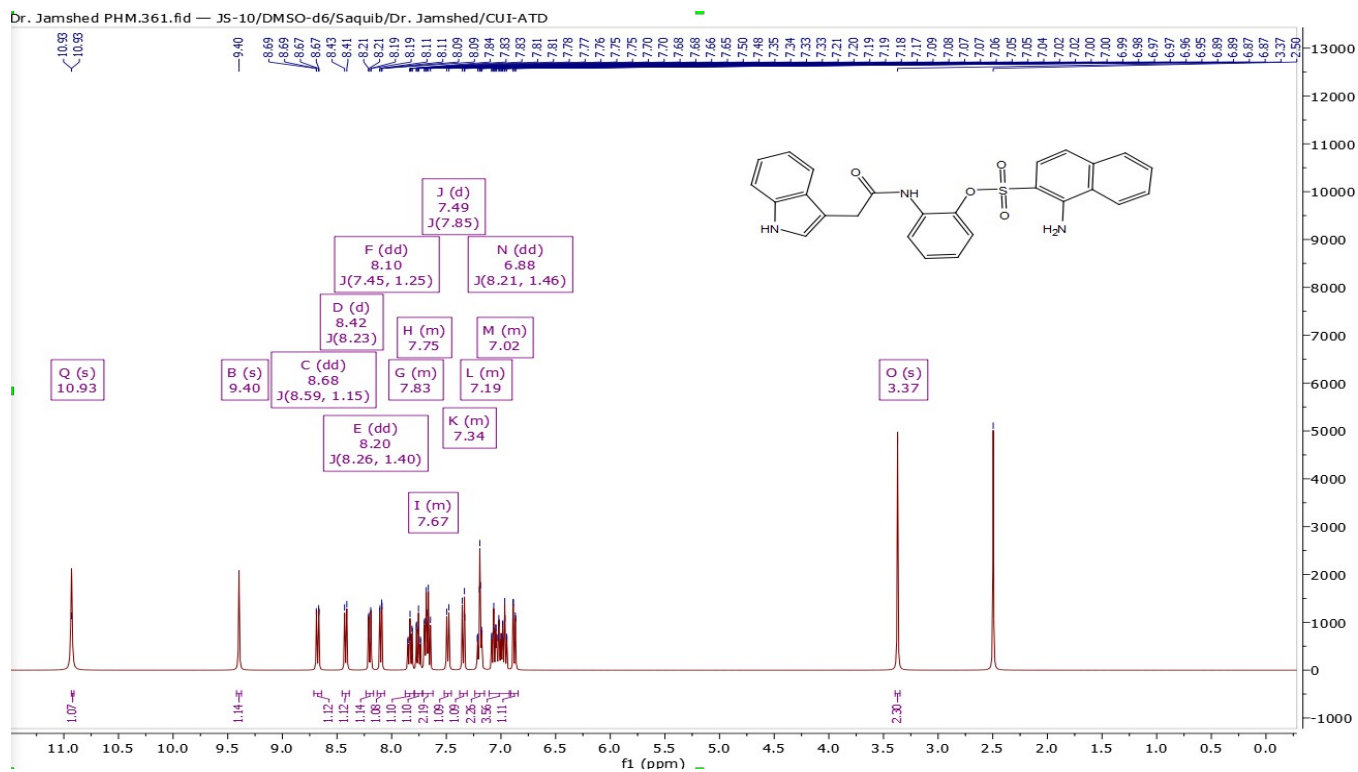

## 5h. <sup>13</sup>C NMR

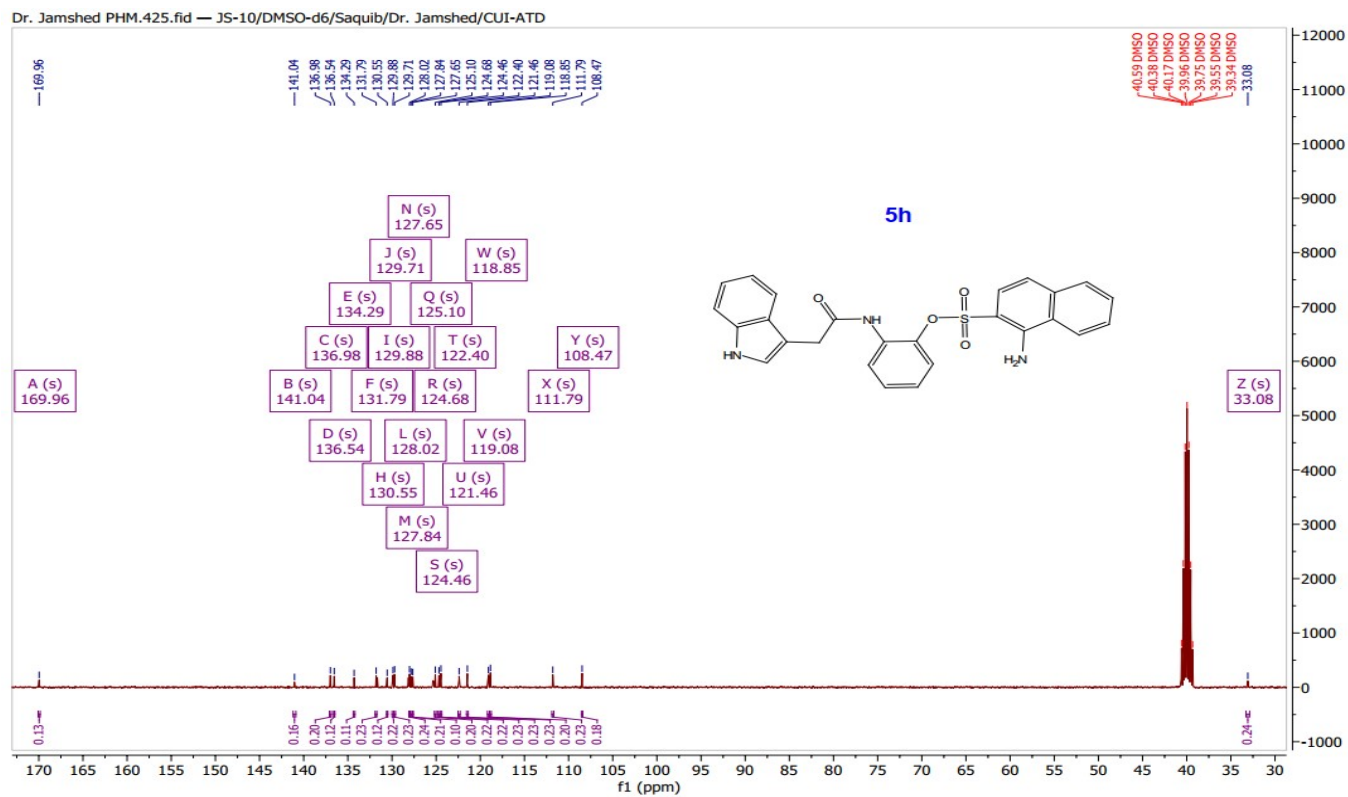

## 5i. <sup>1</sup>H NMR

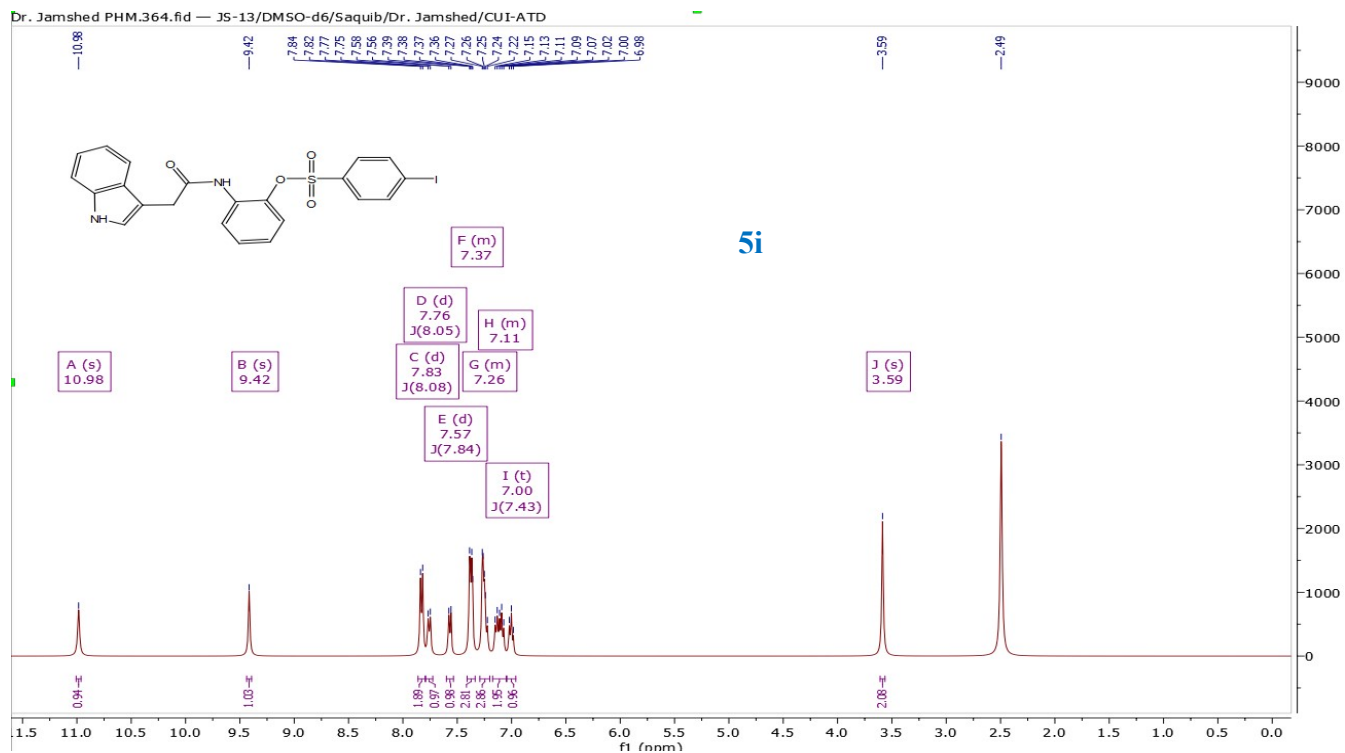

## 5i. <sup>13</sup>C NMR

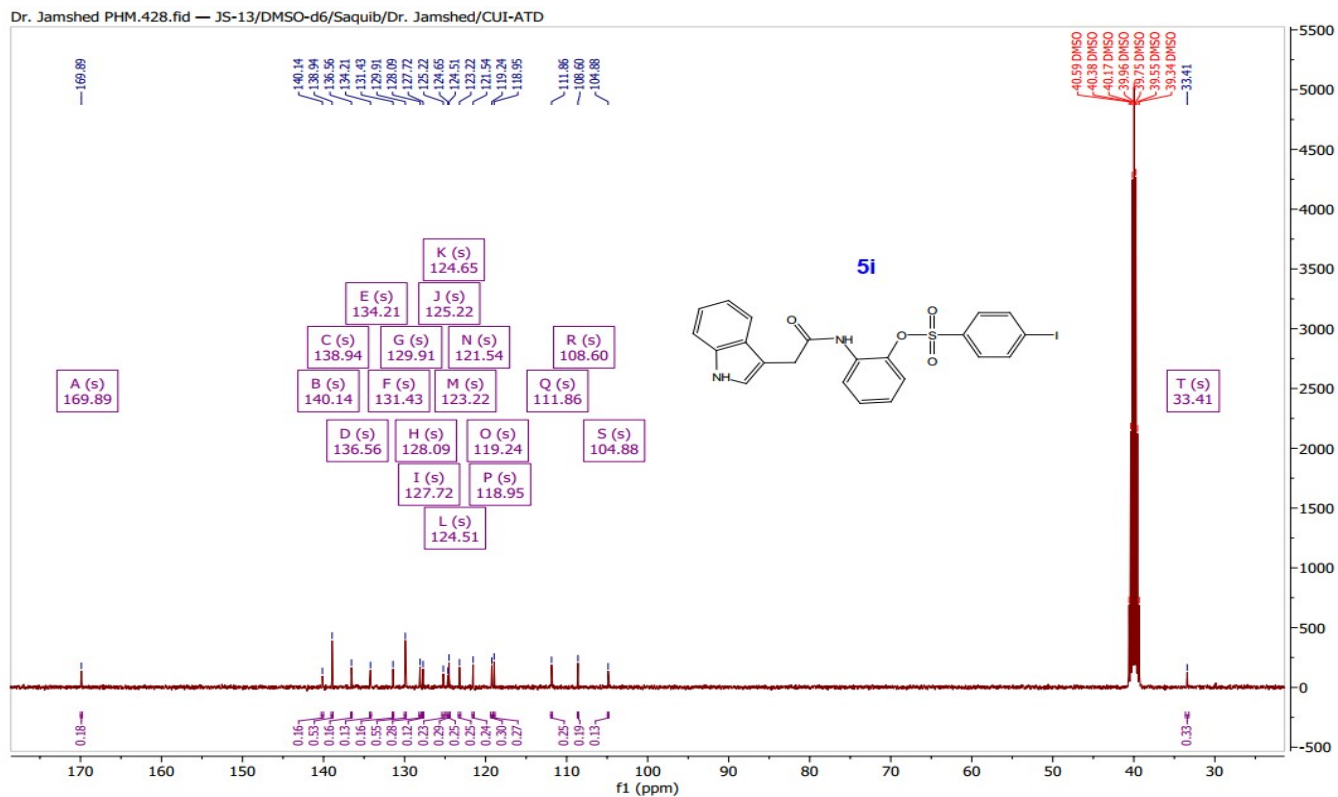

## 5j. <sup>1</sup>H NMR

Dr. Jamshed PHM.429.fid — JS-14/DMSO-d6/Saqib/Dr. Jamshed Iqbal/CUI-ATD

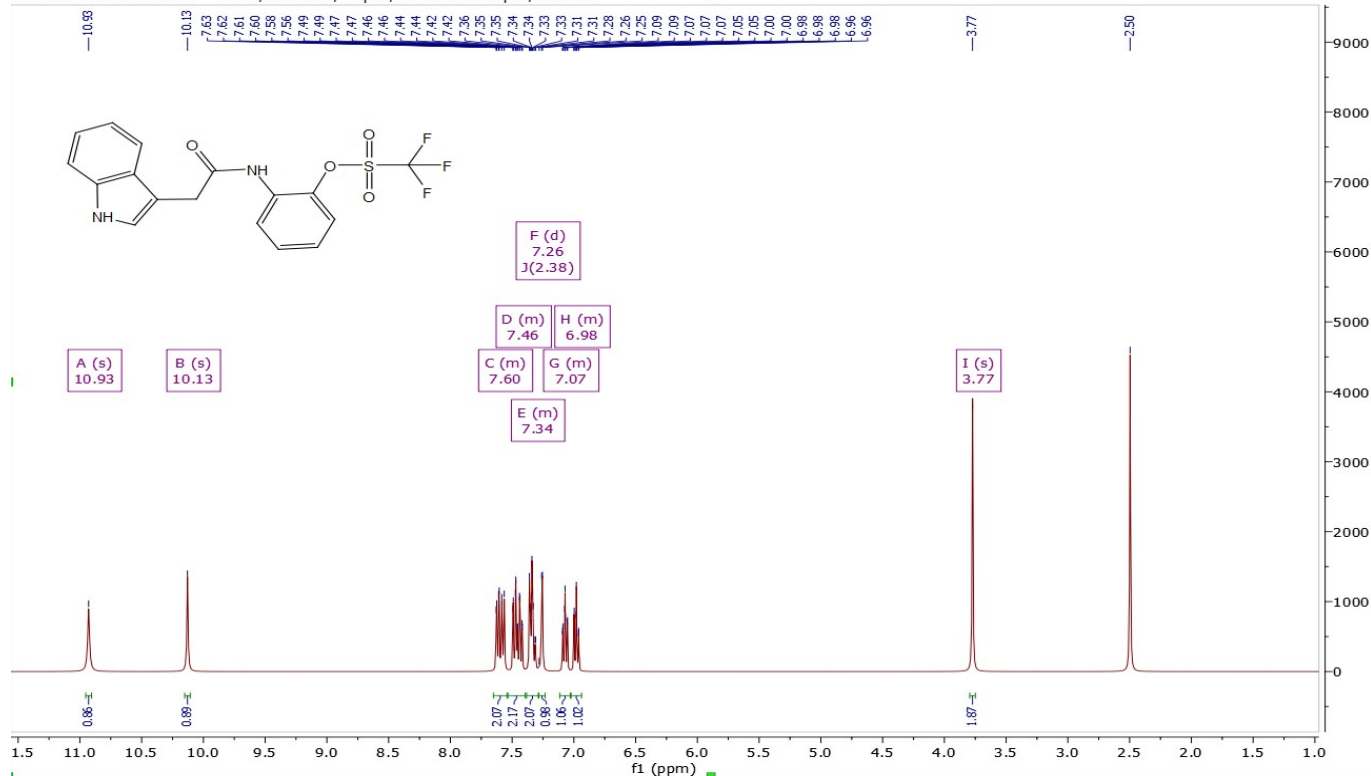

## 5j. <sup>13</sup>C NMR

Dr. Jamshed PHM.435.fid — JS-14/DMSO-d6/Saqib/Dr. Jamshed Iqbal/CUI-ATD

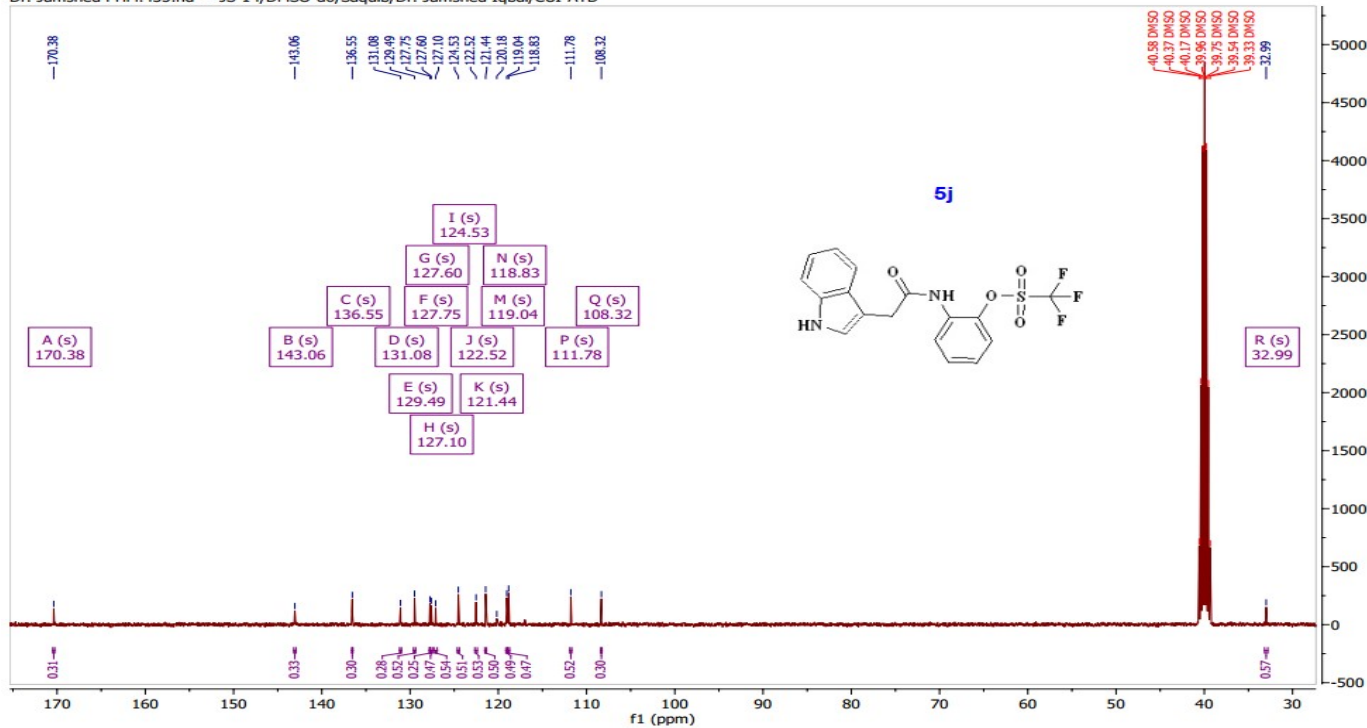

## 5k. <sup>1</sup>H NMR

Dr. Jamshed PHM.430.fid — J5-15/DMSO-d6/Saqib/Dr. Jamshed Iqbal/CUI-ATD

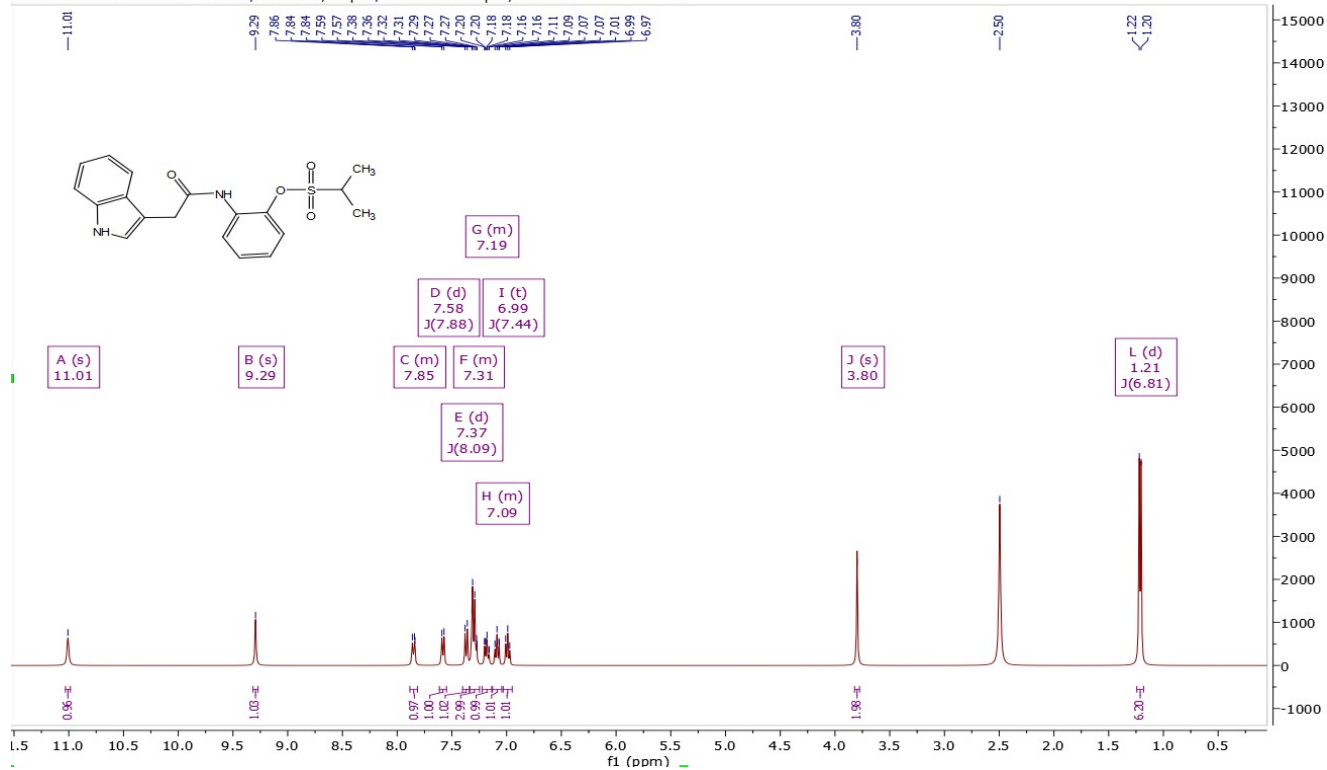

## 5k. <sup>13</sup>C NMR

Dr. Jamshed PHM.436.fid — J5-15/DMSO-d6/Saqib/Dr. Jamshed Iqbal/CUI-ATD

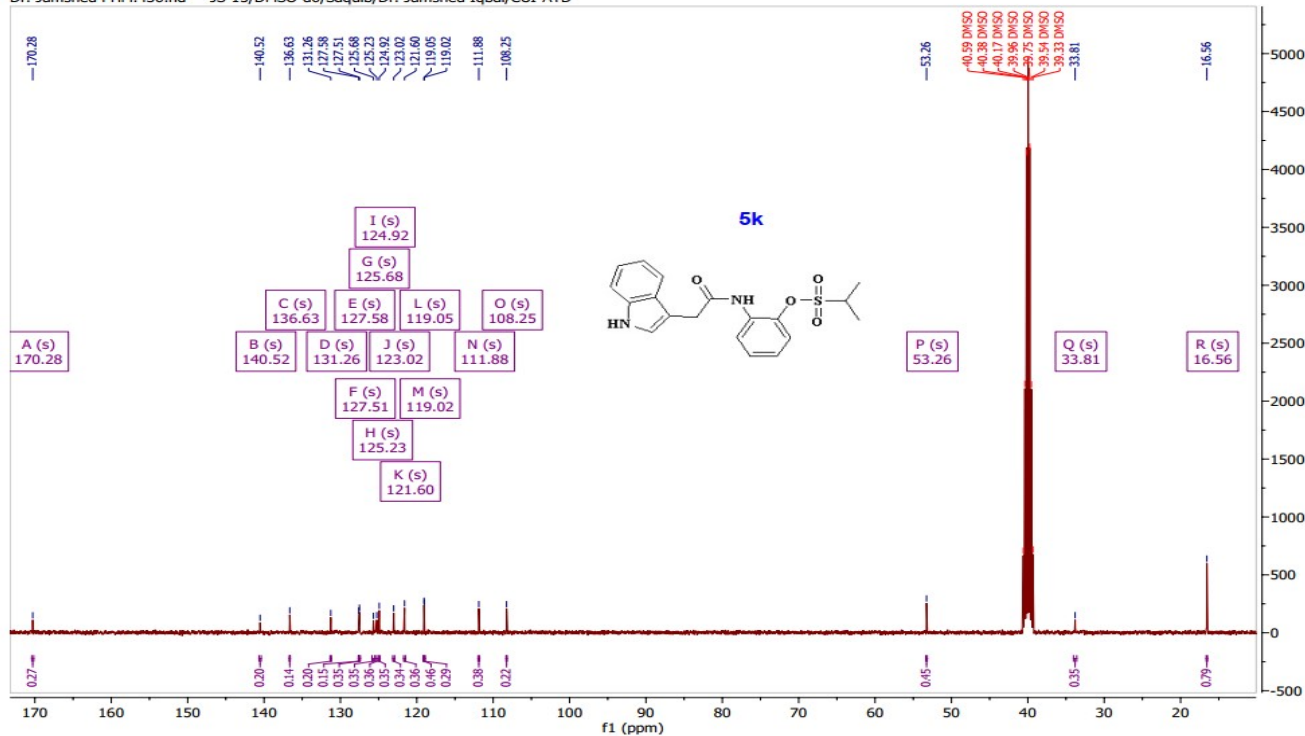

## 5I. <sup>1</sup>H NMR

Dr. Jamshed PHM.431.fid — JS-17/DMSO-d6/Saqib/Dr. Jamshed Iqbal/CUI-ATD

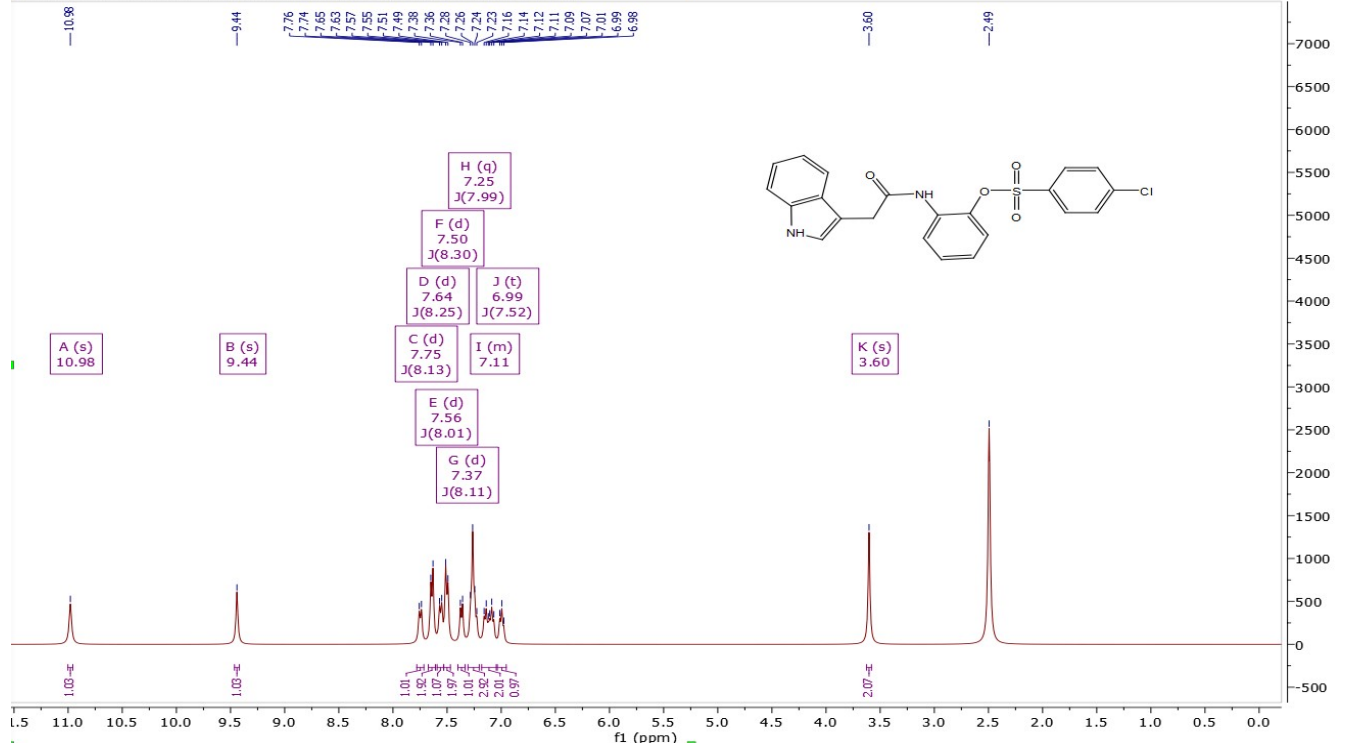

## 5I. <sup>13</sup>C NMR

Dr. Jamshed PHM.437.fid — JS-17/DMSO-d6/Saqib/Dr. Jamshed Iqbal/CUI-ATD

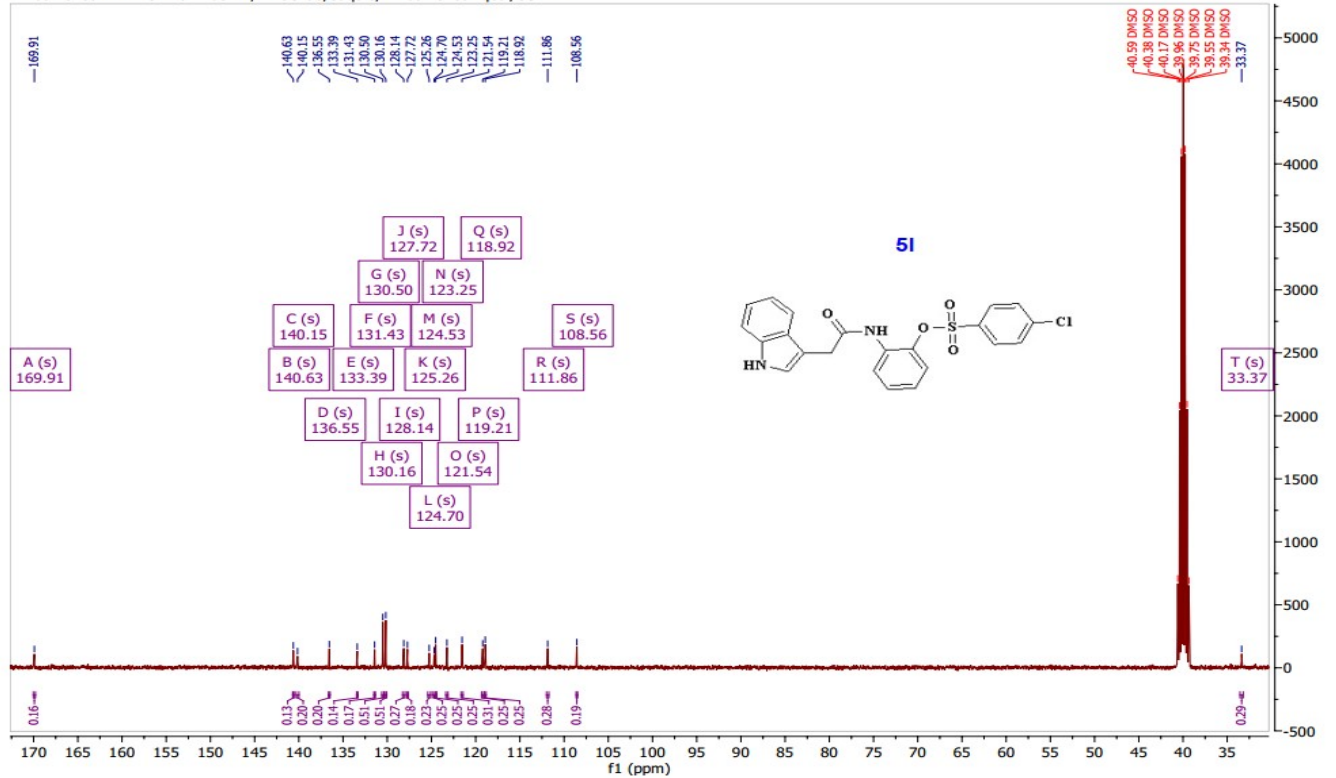

## 5m. <sup>1</sup>H NMR

Dr. Jamshed PHM.432.fid — JS-18/DMSO-d6/Saqib/Dr. Jamshed Iqbal/CUI-ATD

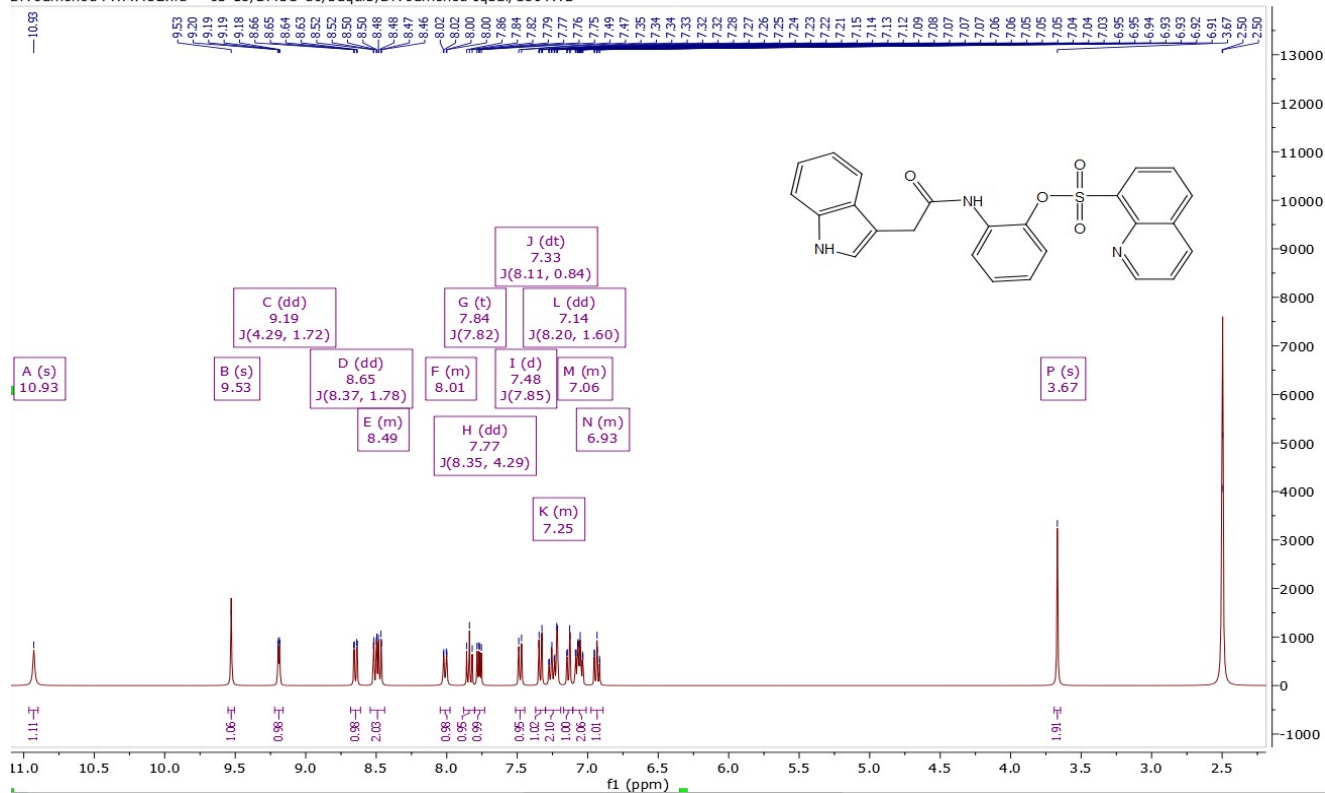

## 5m. <sup>13</sup>C NMR

Dr. Jamshed PHM.438.fid — JS-18/DMSO-d6/Saqib/Dr. Jamshed Iqbal/CUI-ATD

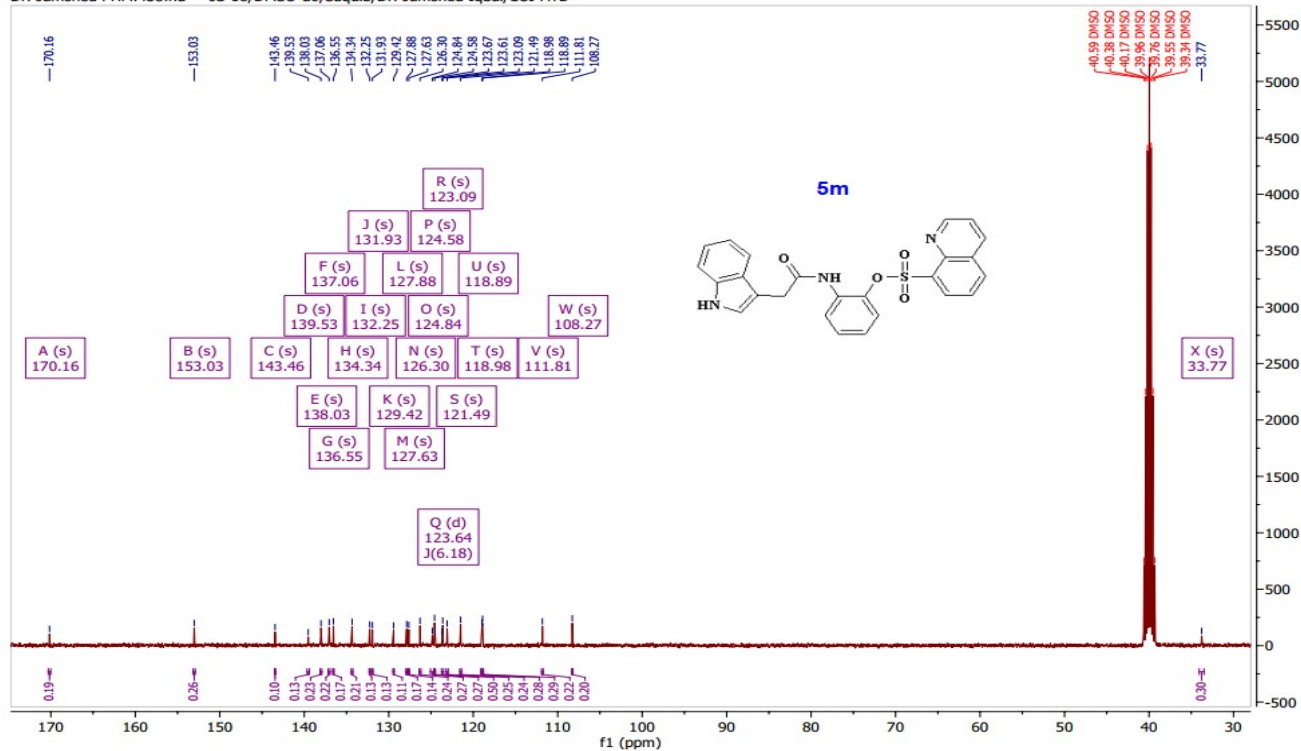

## 5n. <sup>1</sup>H NMR

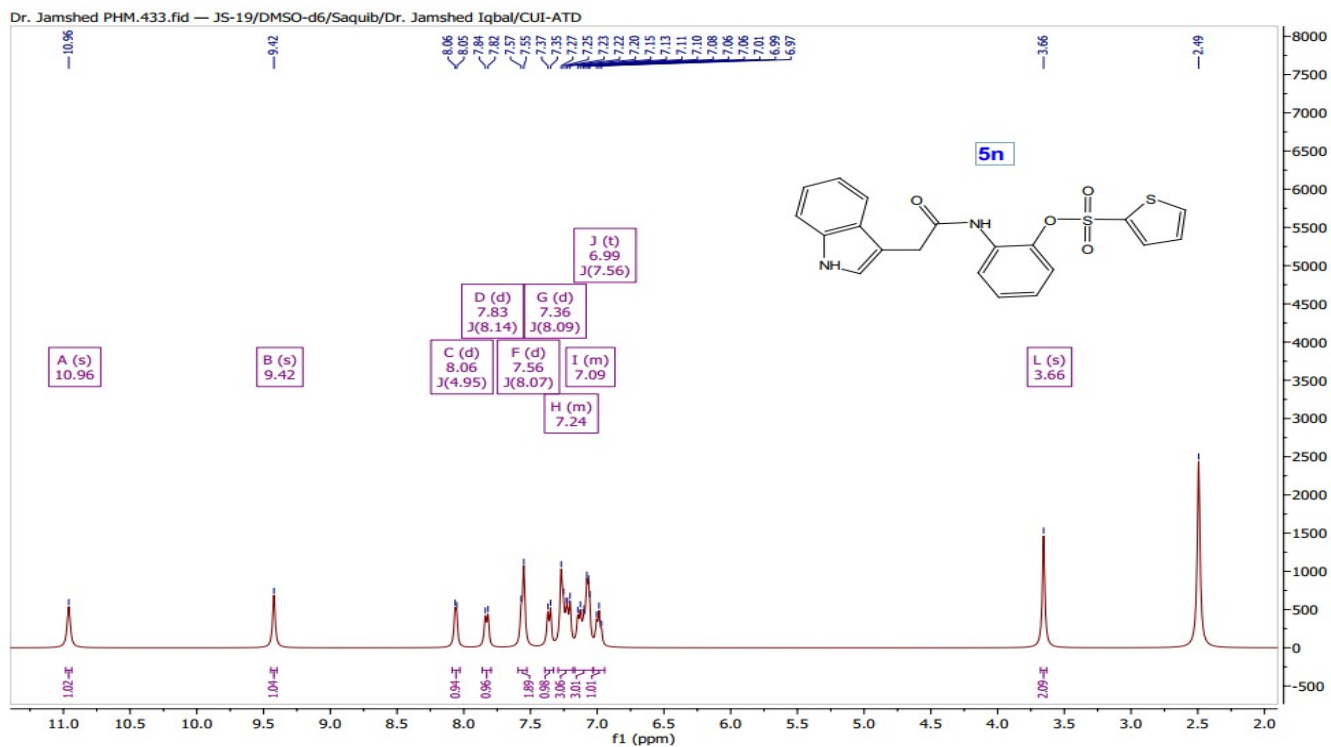

## 5n. <sup>13</sup>C NMR

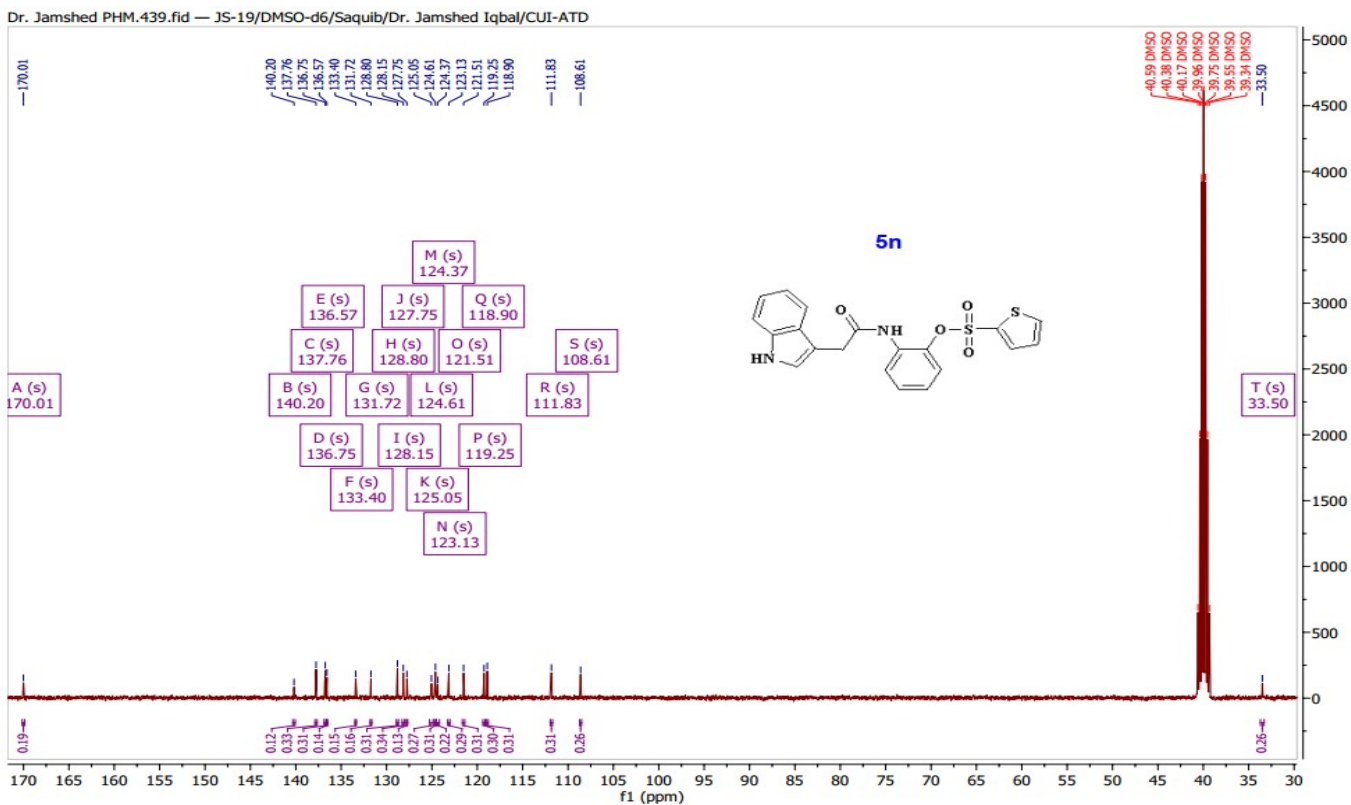

## 50. <sup>1</sup>H NMR

Dr. Jamshed PHM.434.fid — JS-20/DMSO-d6/Saqib/Dr. Jamshed Iqbal/CUI-ATD

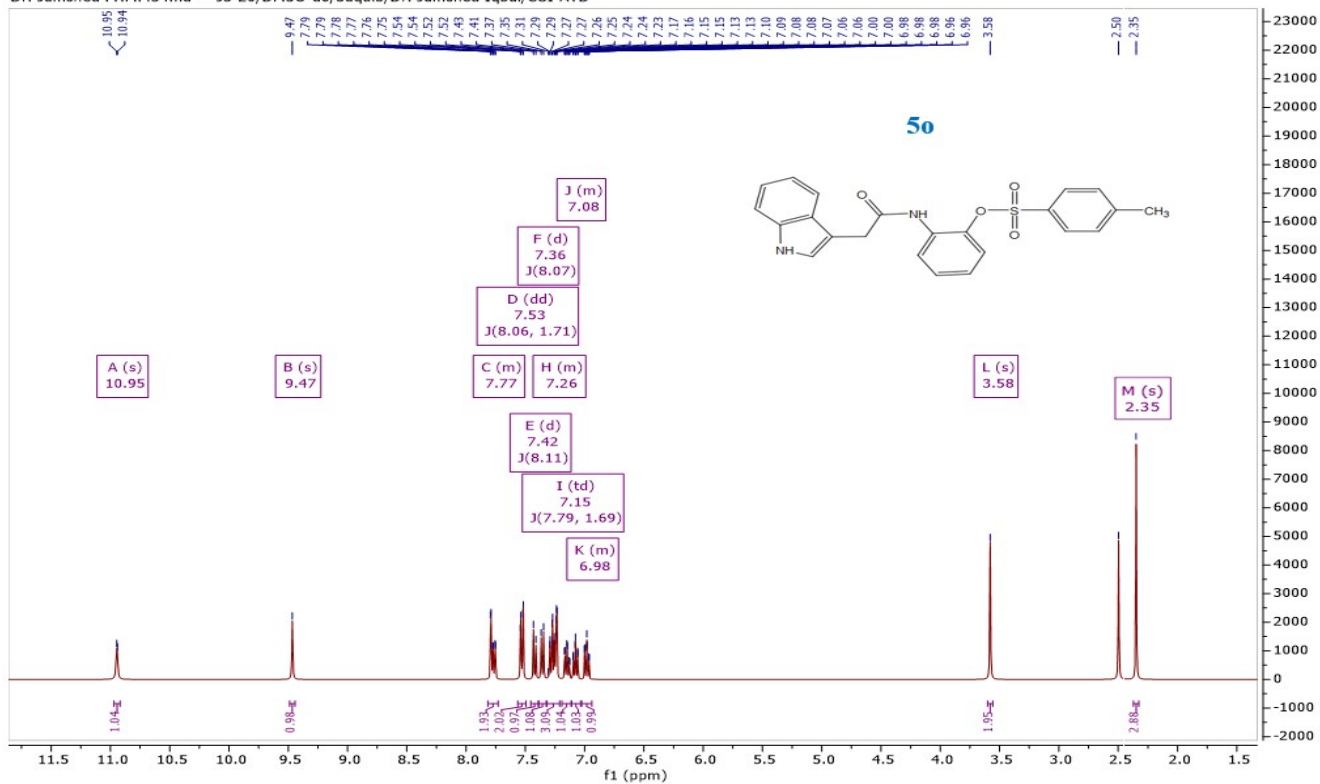

## 50. <sup>13</sup>C NMR

Dr. Jamshed PHM.437.fid — JS-20/DMSO-d6/Siraj/Dr. Jamshed Iqbal/CUI-ATD

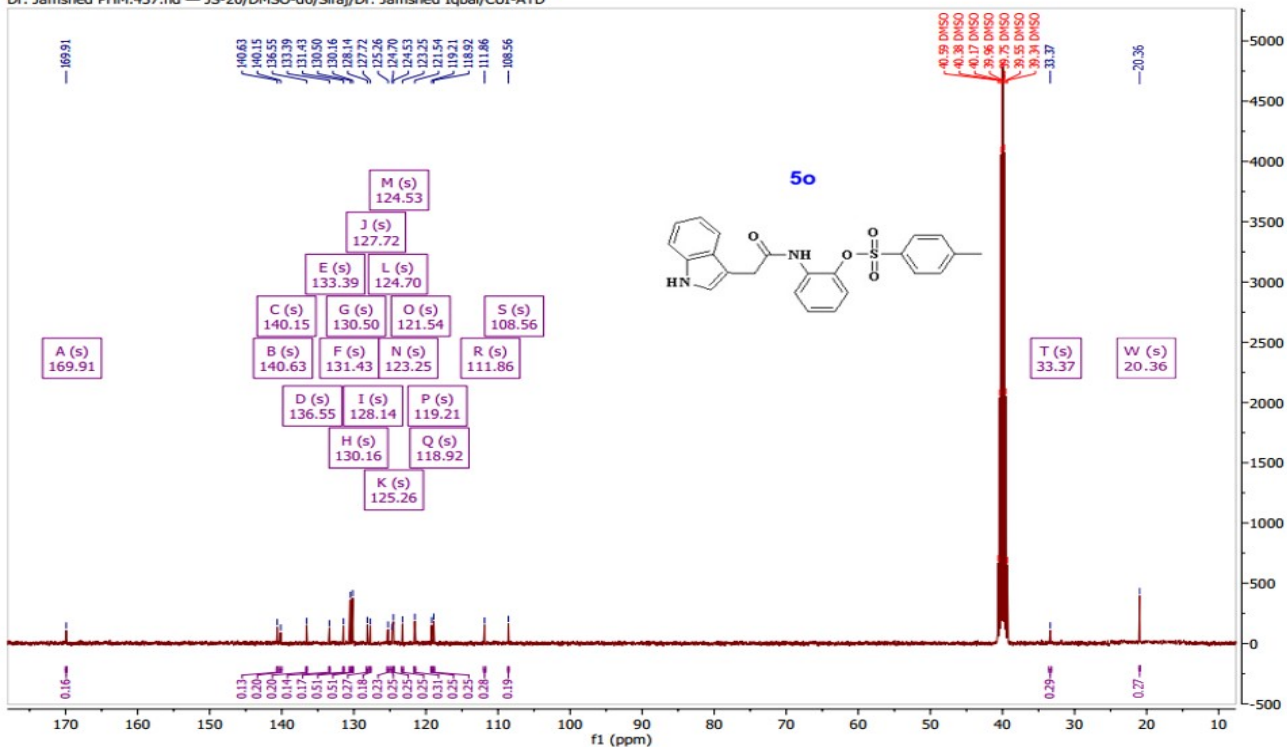

Supplement: d3ra04266a1.pdf [file d3ra04266a1.pdf]
